# Supplementary material for: A trick of the tail: computing the entropic contribution to the energetics of quinone-protein unbindung
Source: Royal Society of Chemistry journal article supplement (doi:10.1039/d3cp03466f), 2023-01-01

**A trick of the tail: computing the entropic  
contribution to the energetics of quinone-protein  
unbindung**

**Supporting information**

Jetmir Haxhija, Felix Guischar, Thorsten  
Koslowski

Institut für Physikalische Chemie,  
Universität Freiburg, Albertstraße 21, 79104  
Freiburg, Germany

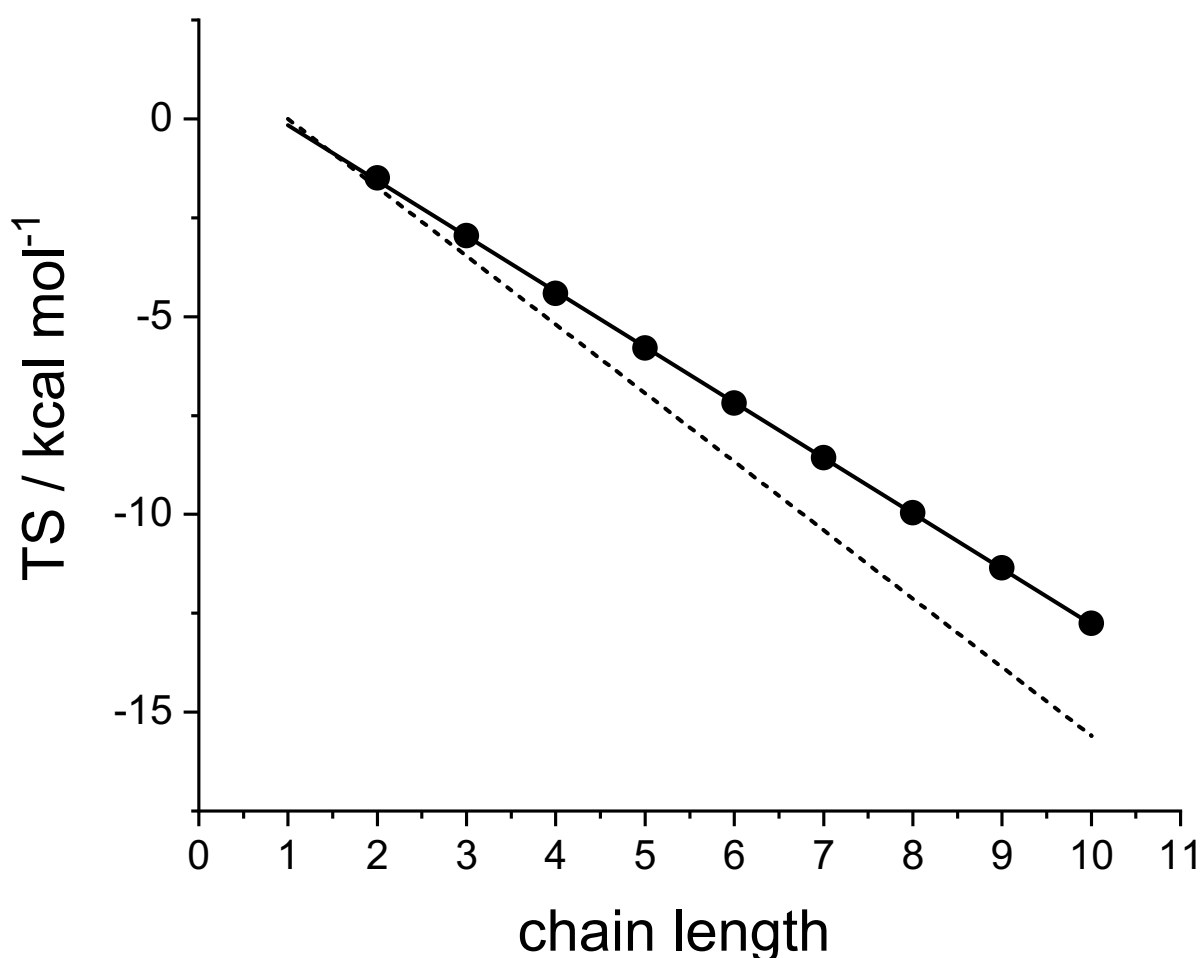

**Figure S1.** Entropic contributions to the free energy as a function of the isoprenoid side chain length. Linear regression analysis of the data presented in table 1 of the main article. Bullet symbols: computed data, solid line: linear regression line, dashed line: theoretical limit for an acceptance ratio of unity in eq. 1, main article. This corresponds to a fully flexible chain with 18 dihedral angle states per isoprene monomer.

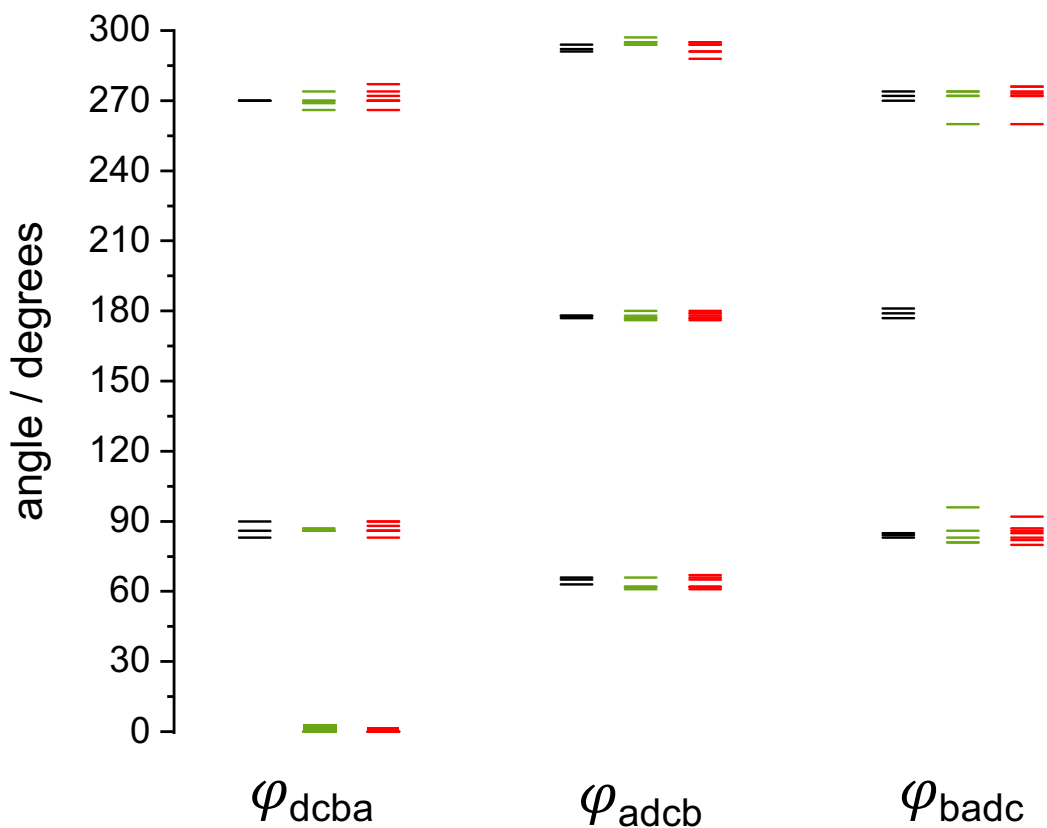

**Figure S2.** Level plot of the menaquinol dihedral angles, with letters as indicated in figure 1 of the main article. Black: MHK4, green: MHK6, red: MHK8.

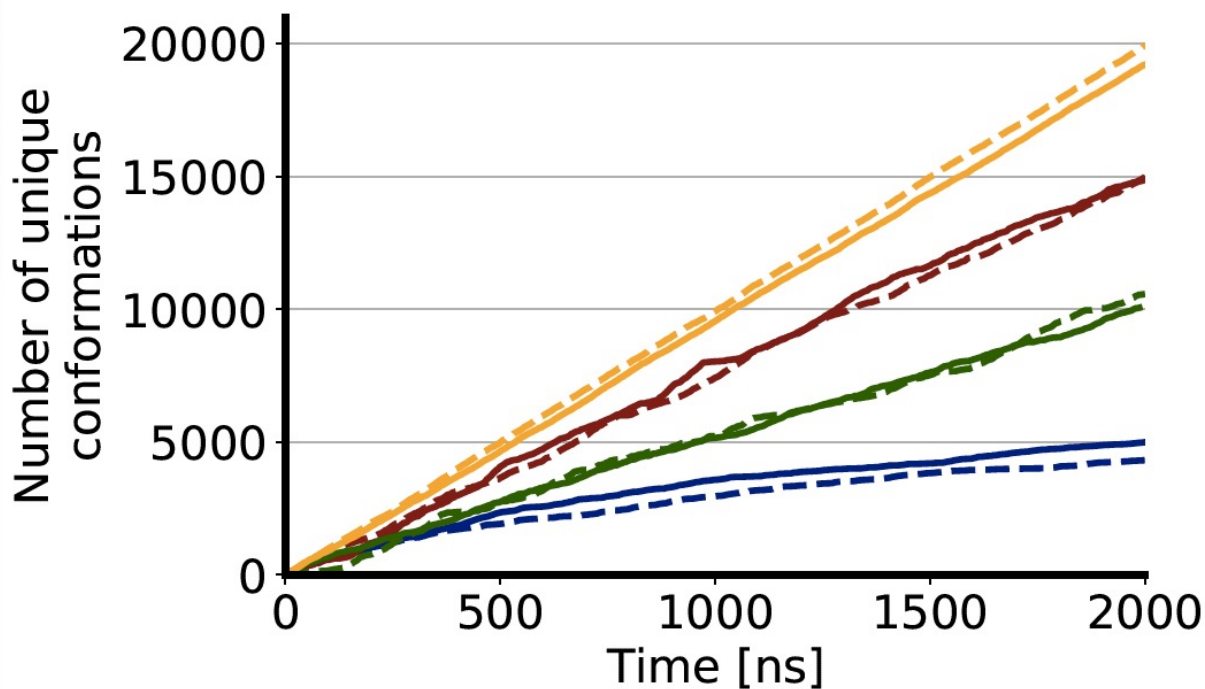

**Figure S3.** Number of unique conformations found during the MD simulation as a function of time. The lines represent menaquinol-6 (orange dashed line) and menaquinone-6 (full orange line) in n-hexane. In addition, we show menaquinol-8 (red dashed line), menaquinone-8 (full red line), menaquinol-6 (green dashed line) menaquinone-6 (full green line), menaquinol-4 (blue dashed line) menaquinone-4 (full blue line), all embedded in a lipid bilayer membrane.

# Dihedral angles

Angles are enumerated according to their position in the side chain with reference to the naphthoquinone moiety of the quinone or quinol, cf. figure 1 of the main article.

We have:

- angles 3, 6, 9, ... =  $\varphi_{\text{badc}}$
- angles 4, 7, 10, ... =  $\varphi_{\text{adcb}}$
- angles 5, 8, 11, ... =  $\varphi_{\text{dcba}}$

## Figure set S4. Menaquinol-4 (MHK4) in a lipid bilayer

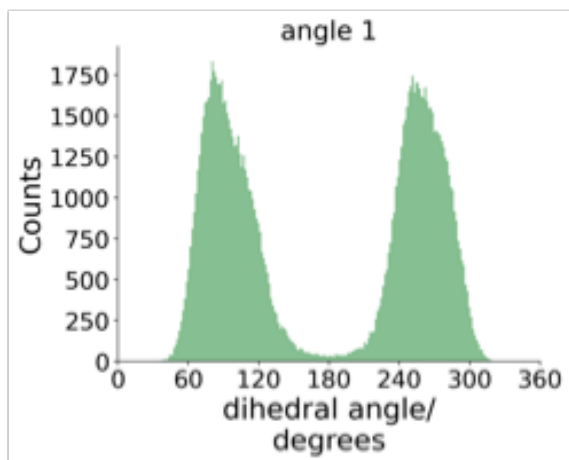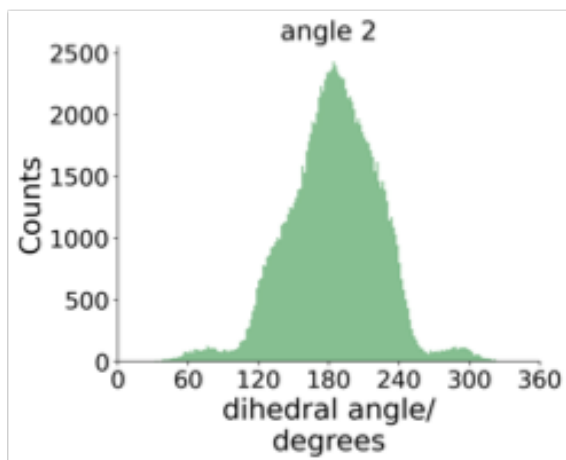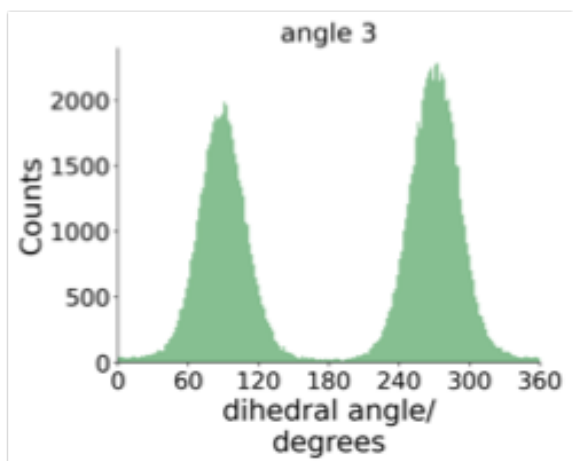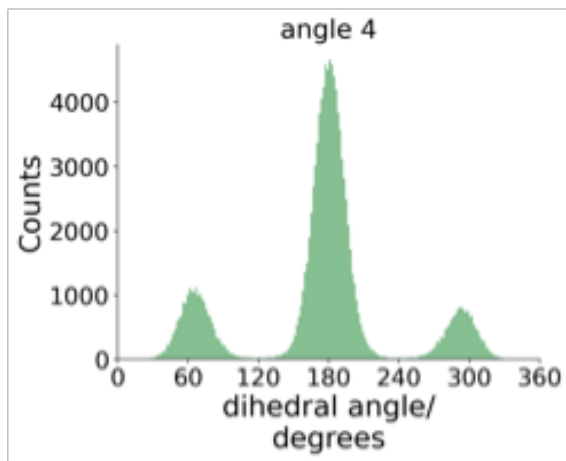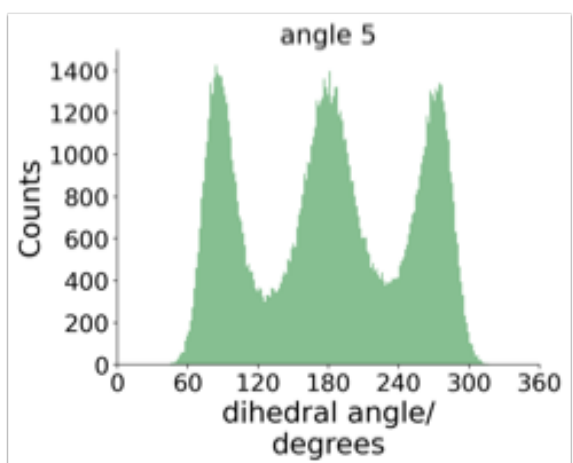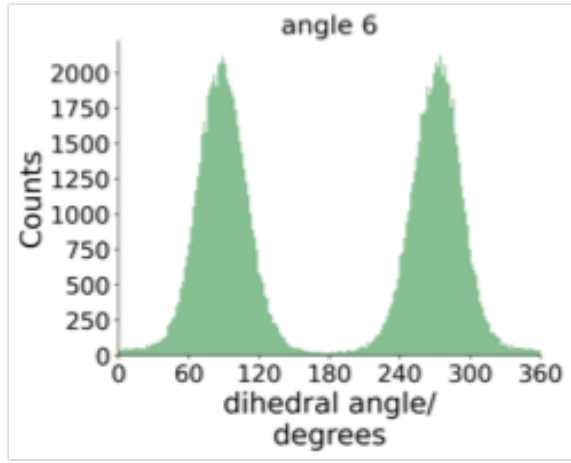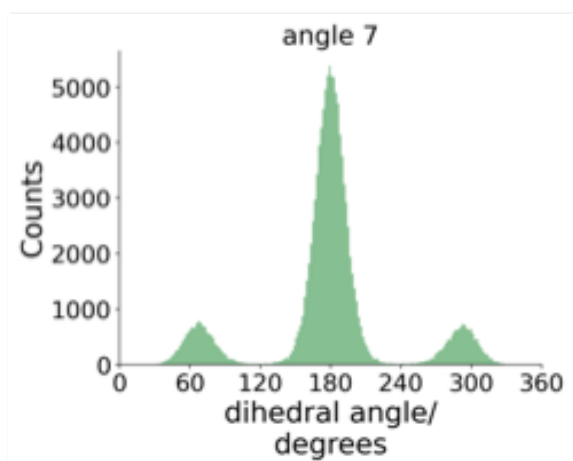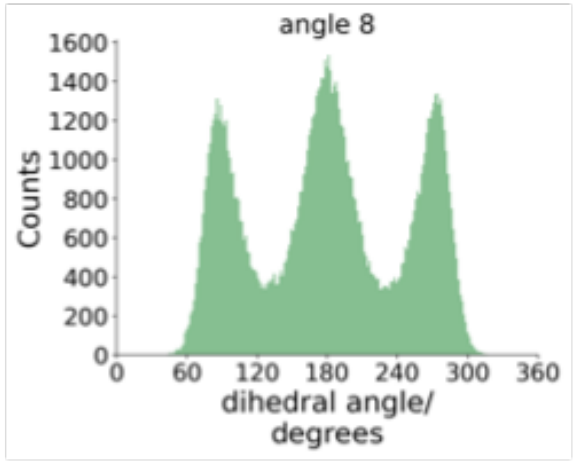

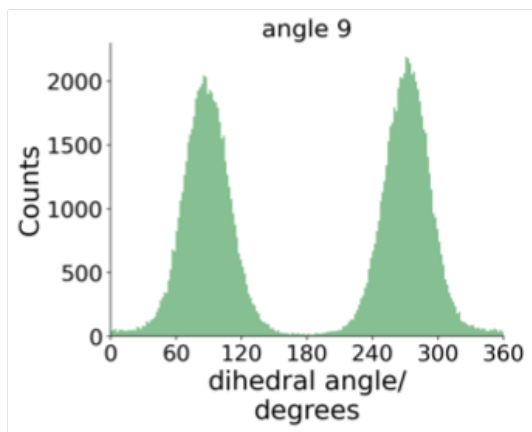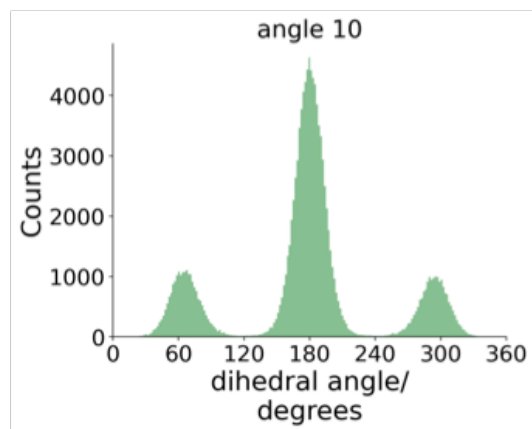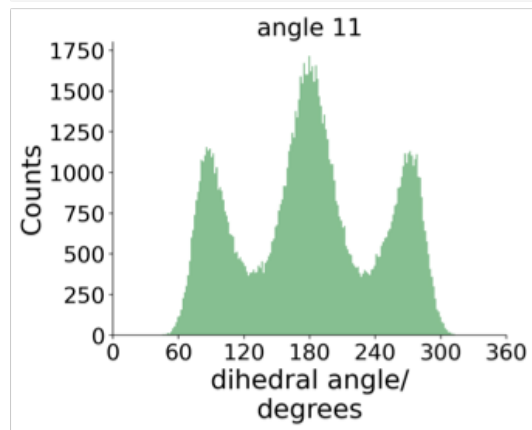



## Figure set S5. Menaquinol-6 (MHK6) in a lipid bilayer

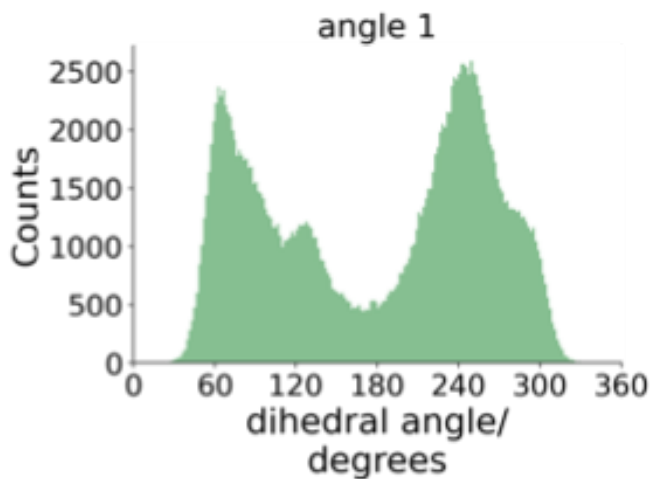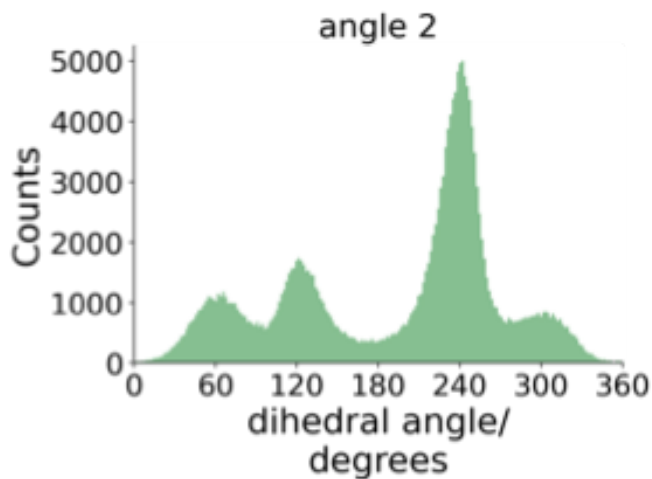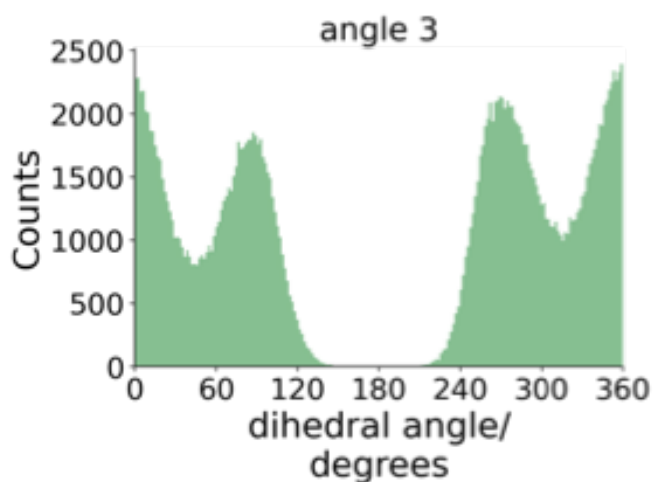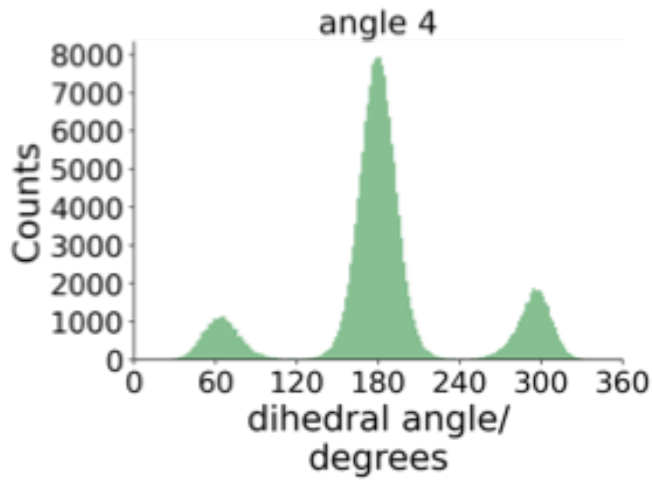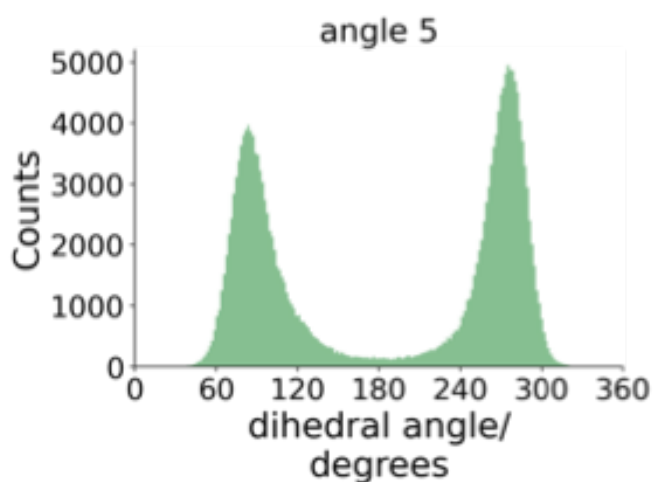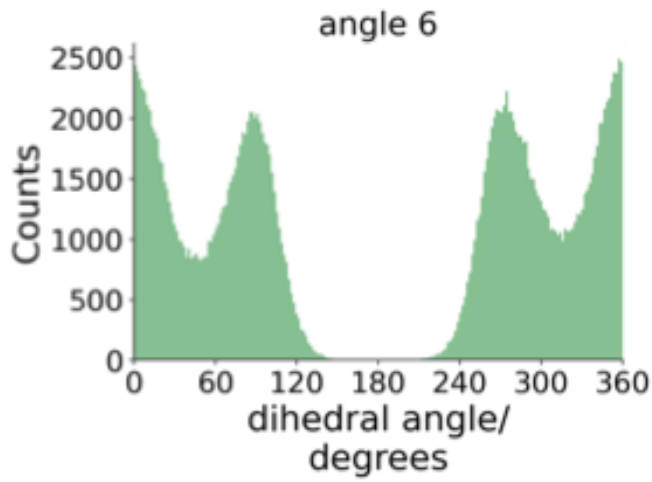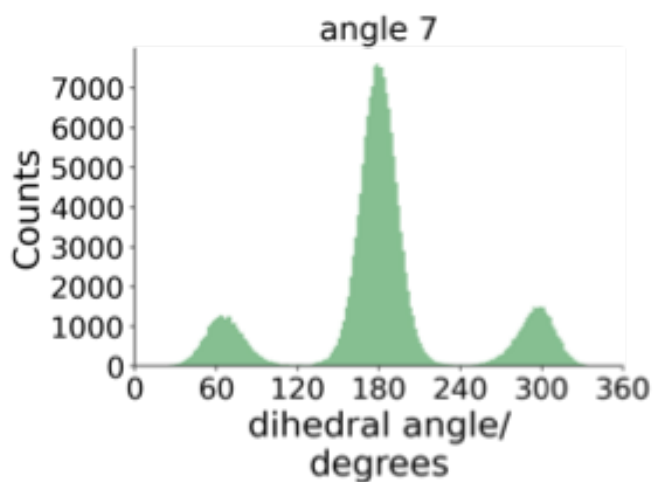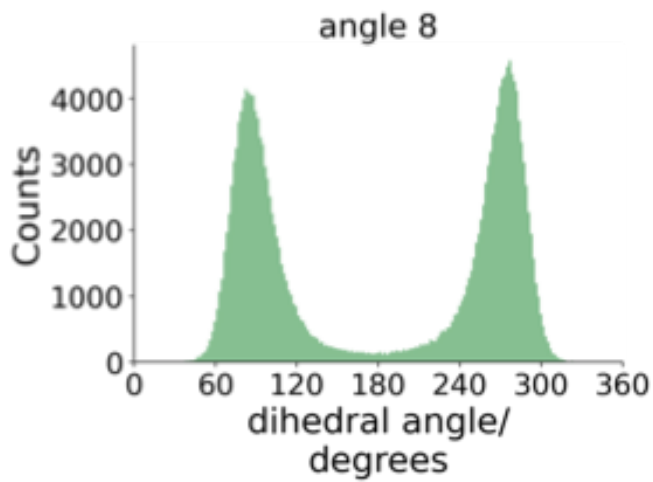

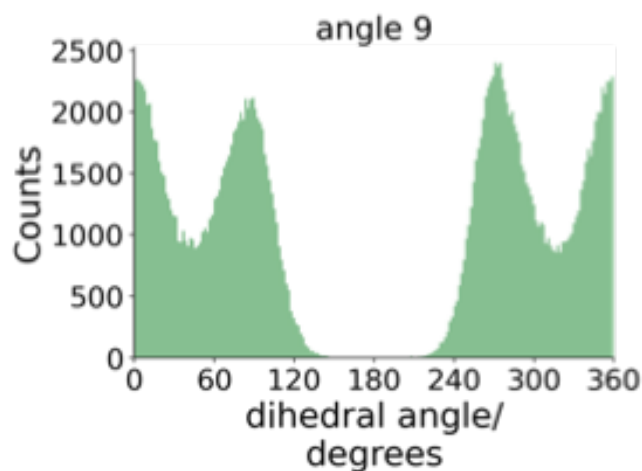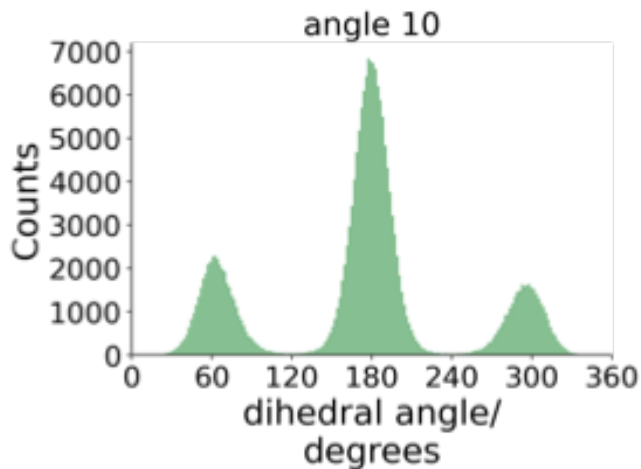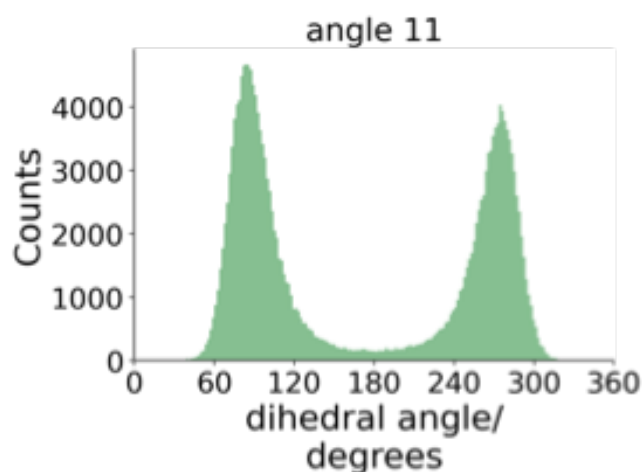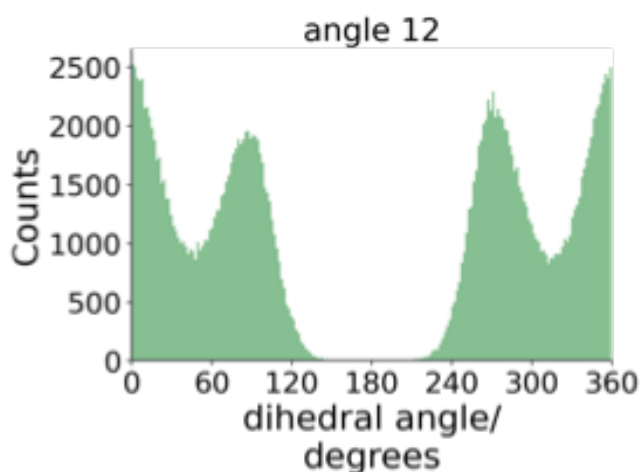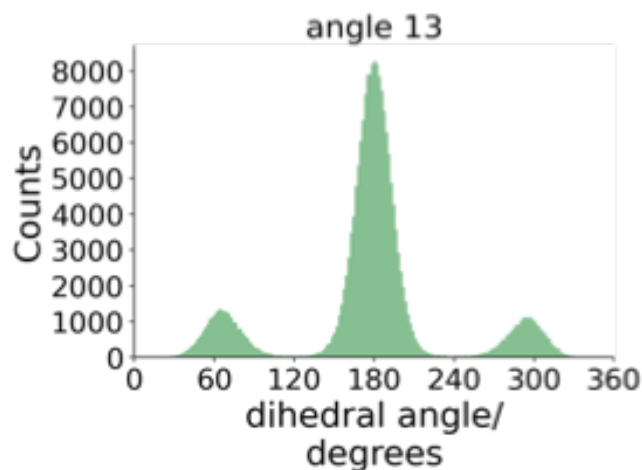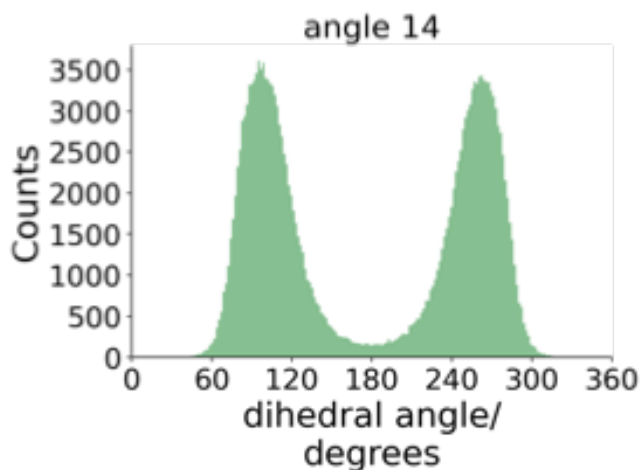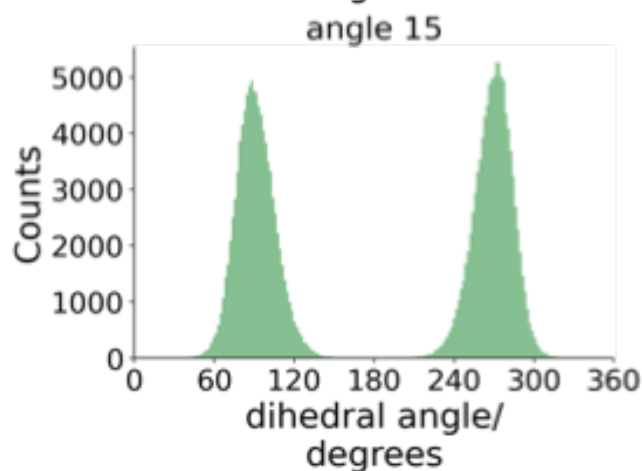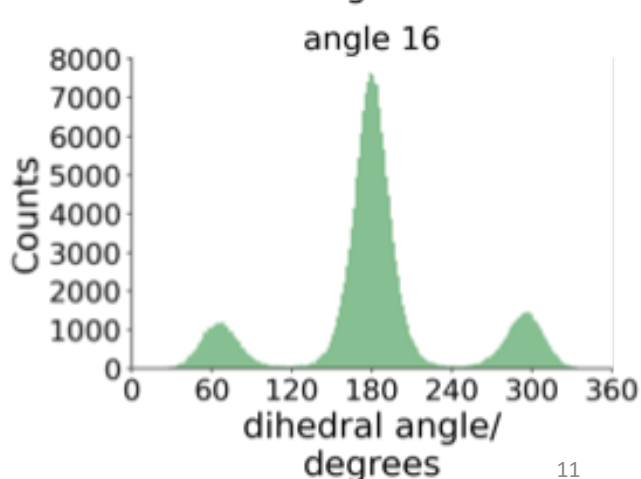

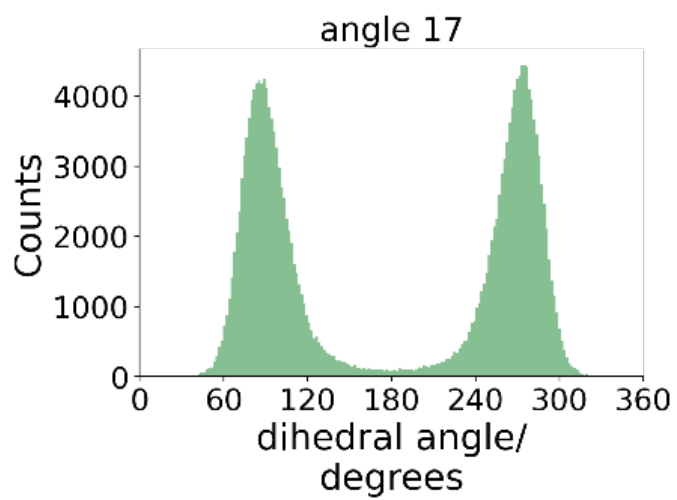

# Figure set S6. Menaquinol-6 (MHK6) in n-hexane

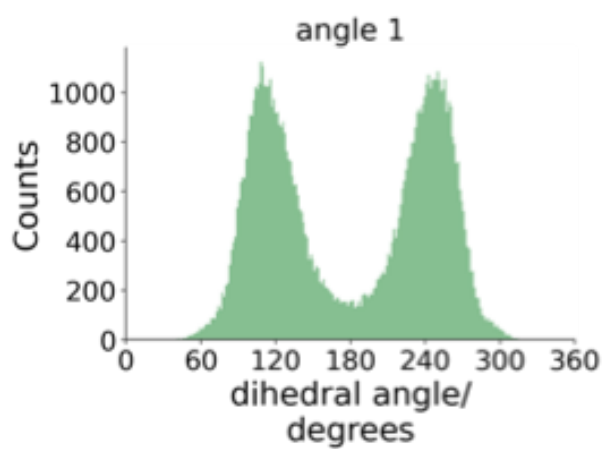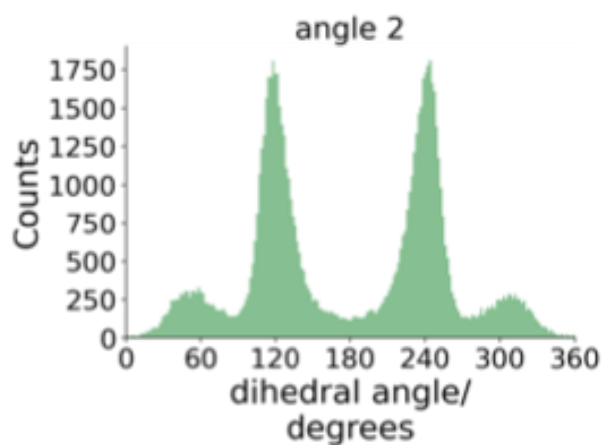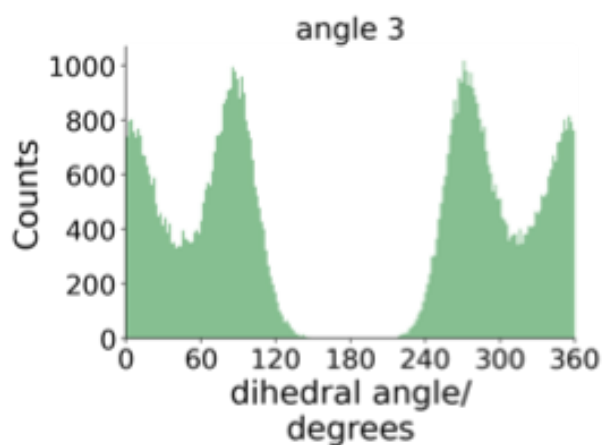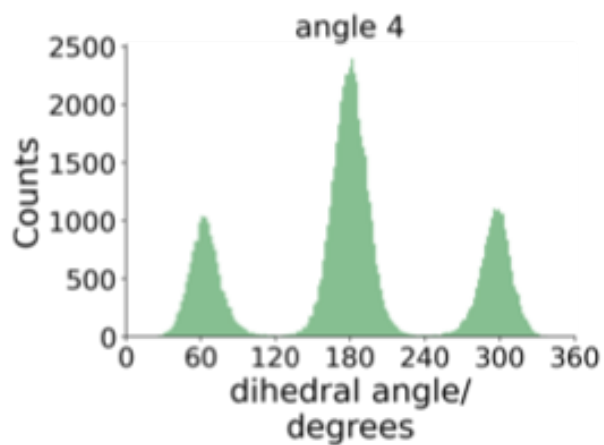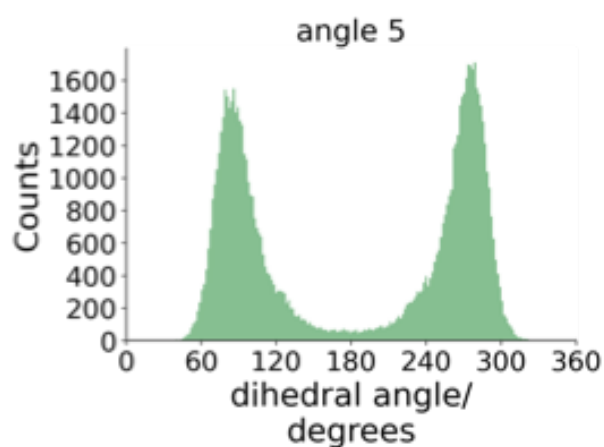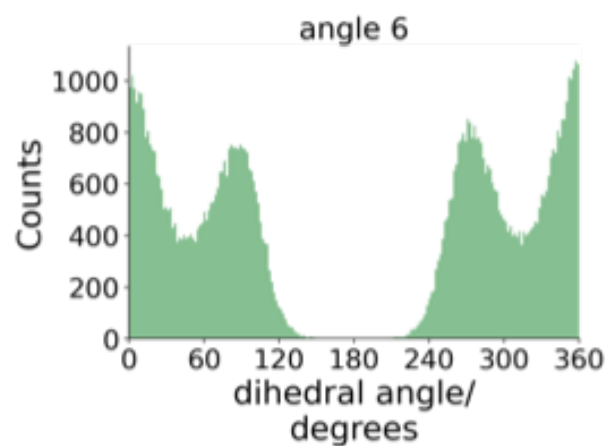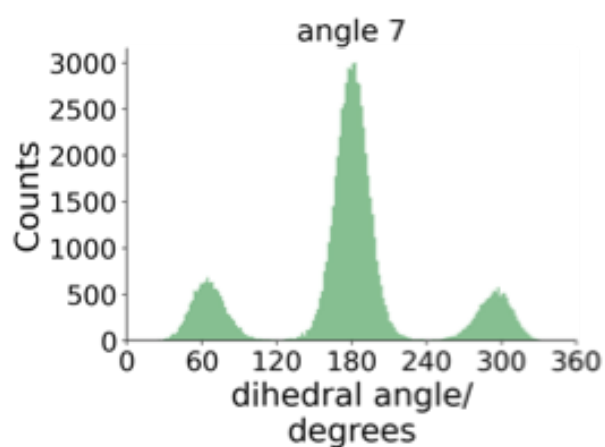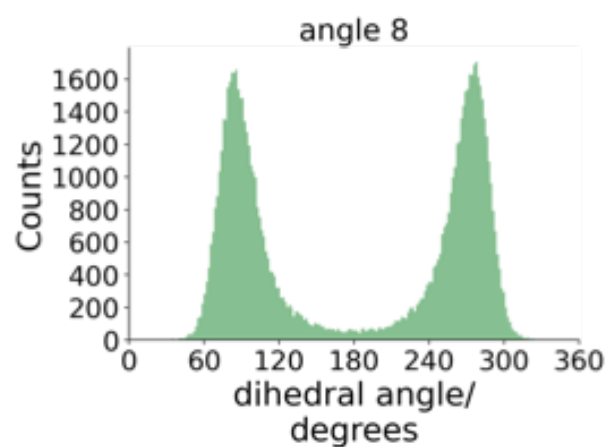

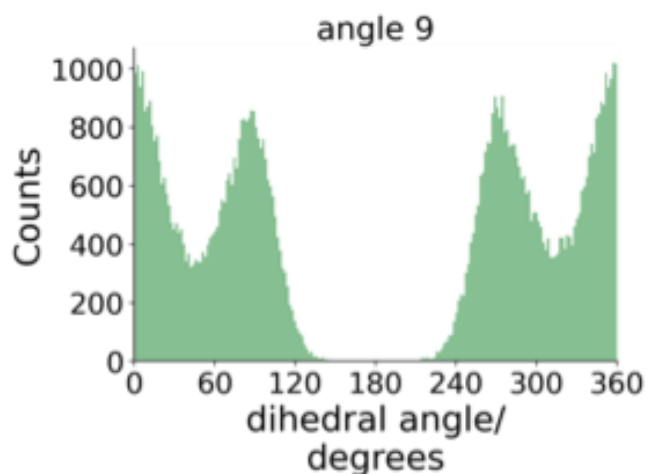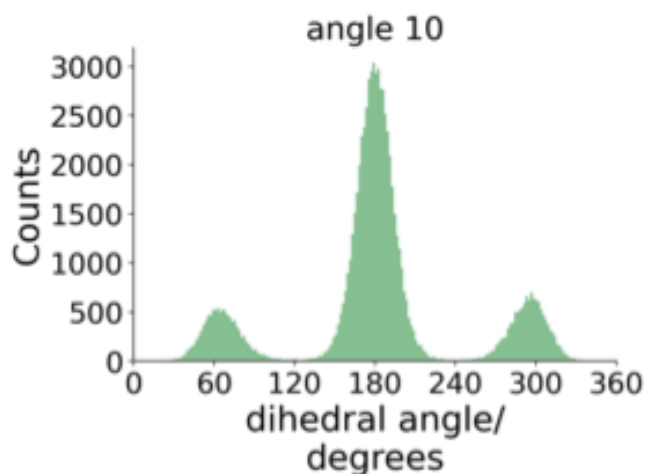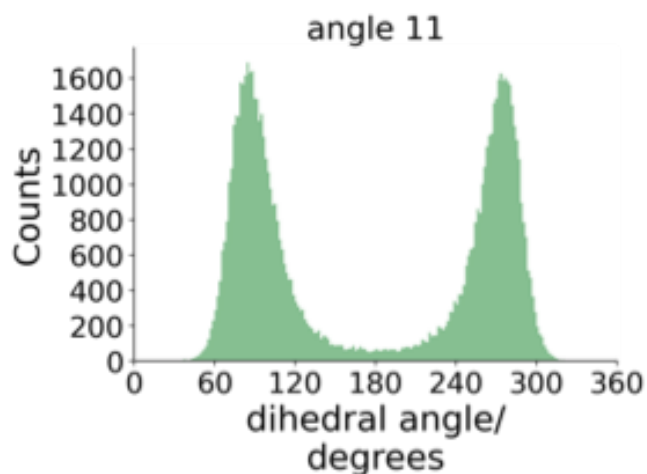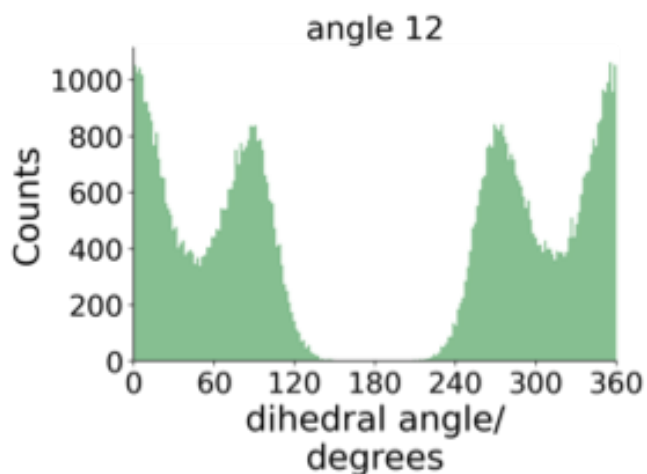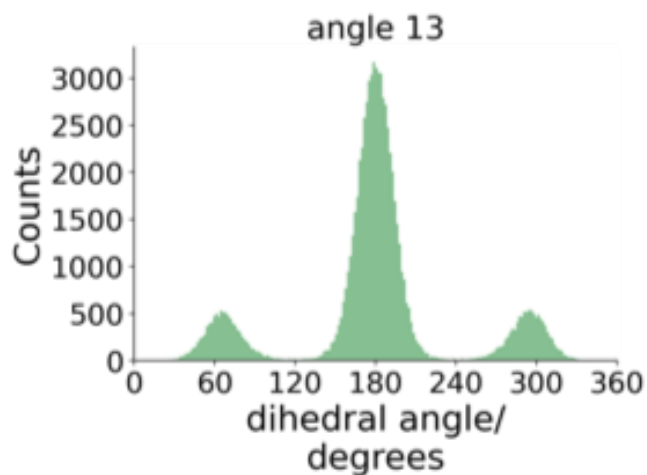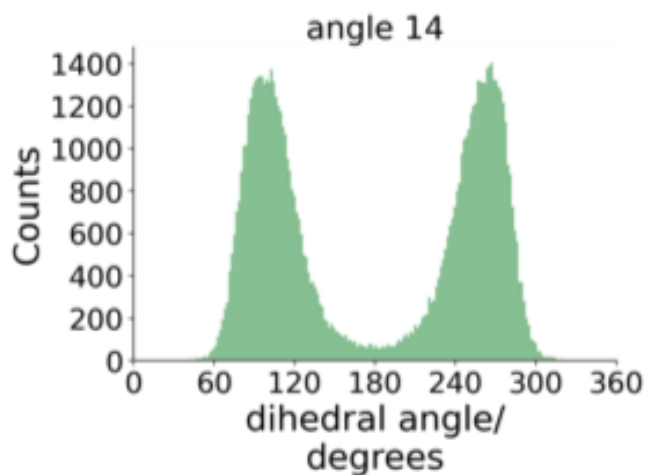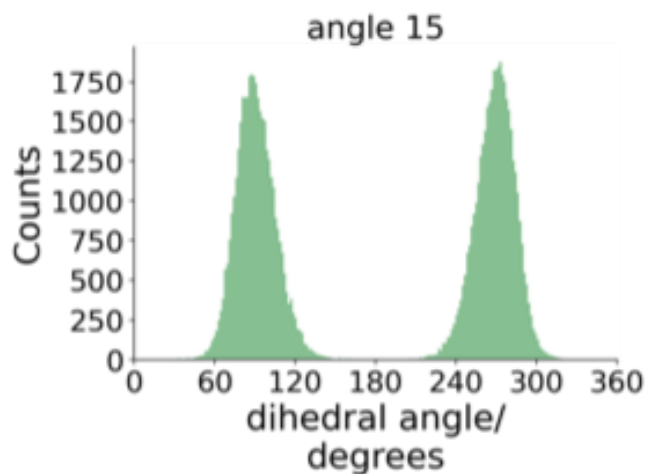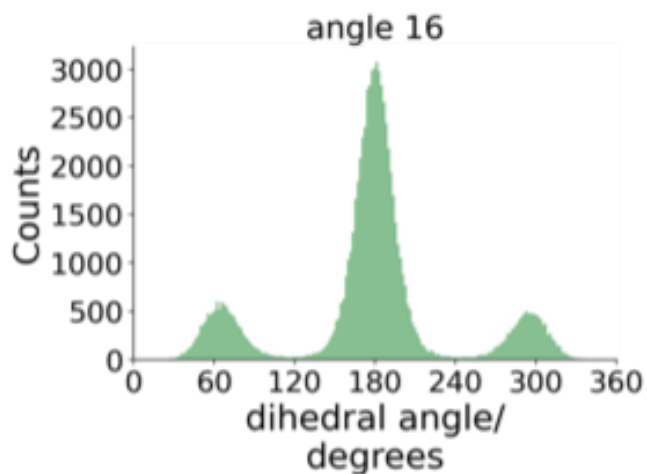

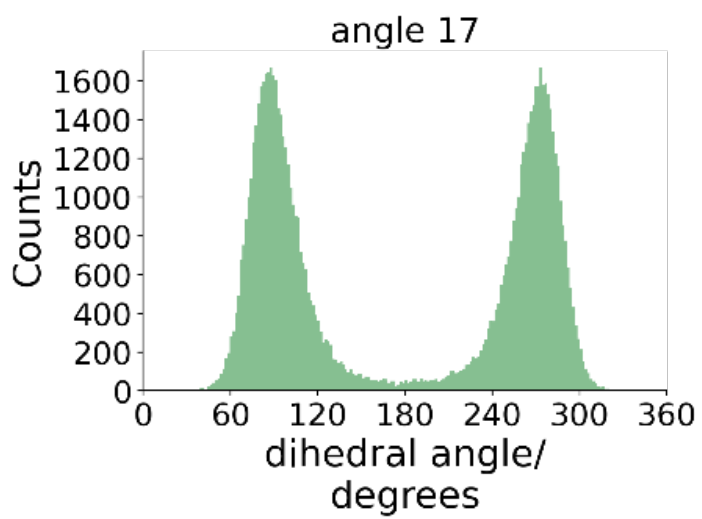



# Figure set S7. Menaquinol-8 (MHK8) in a lipid bilayer

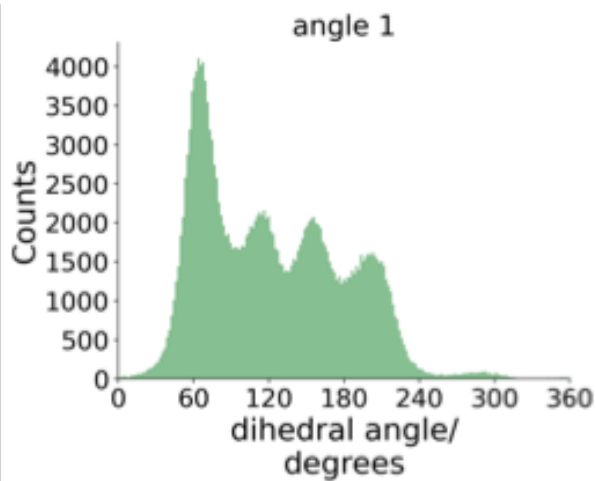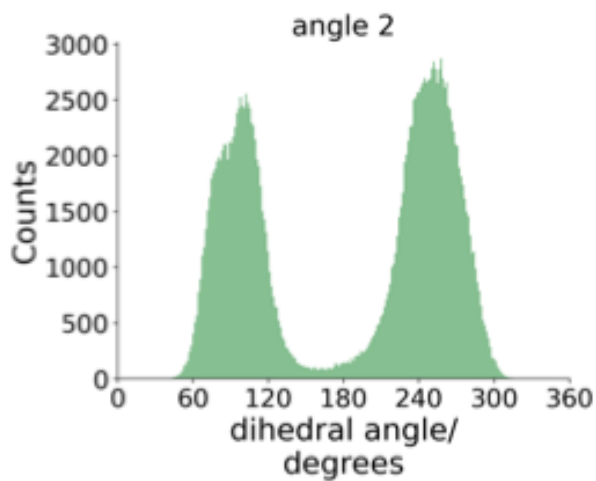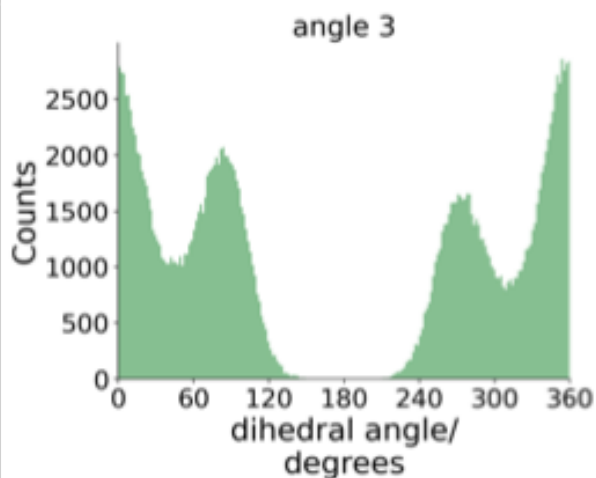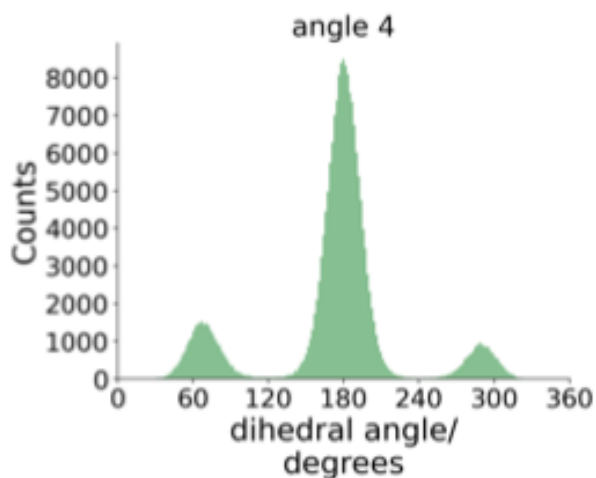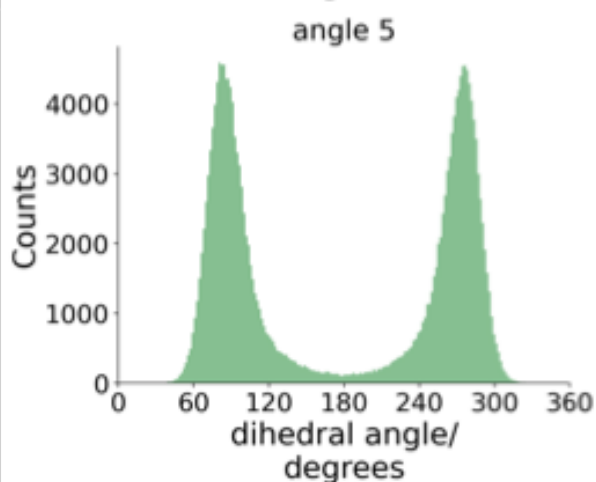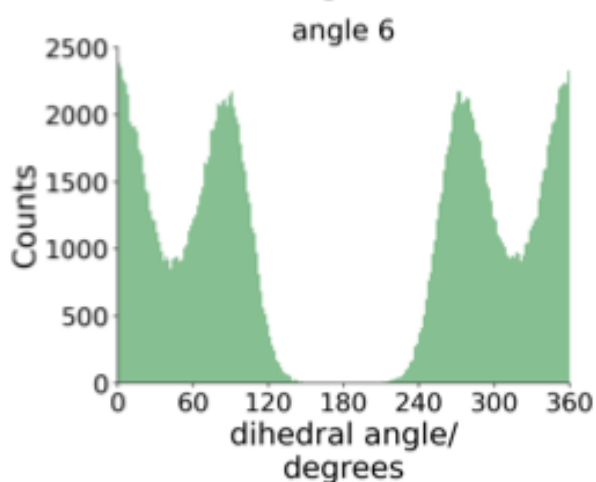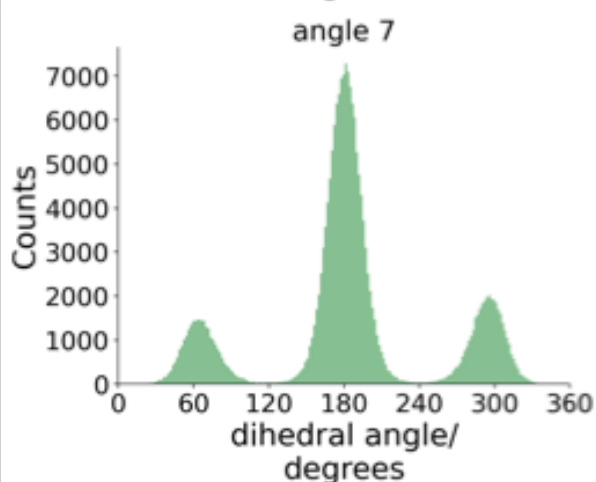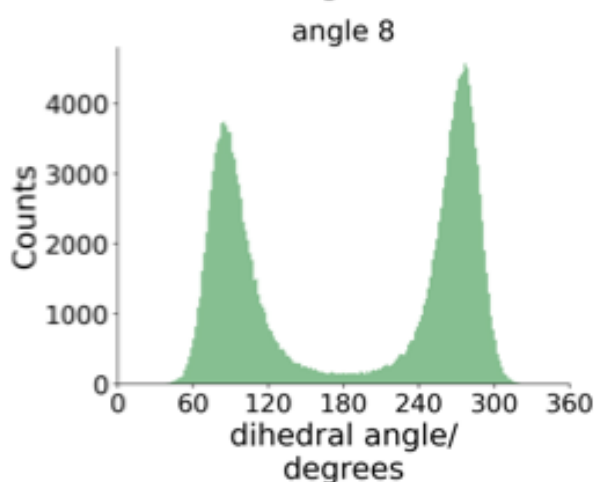

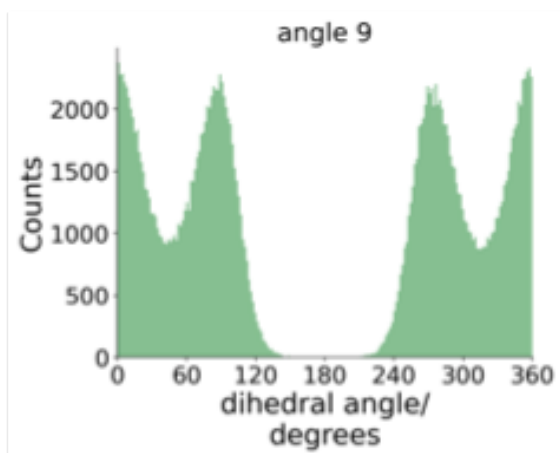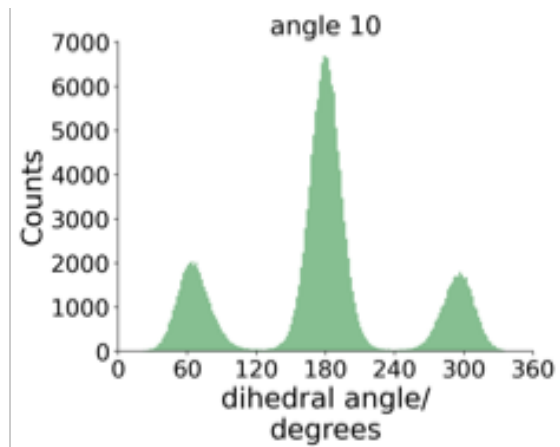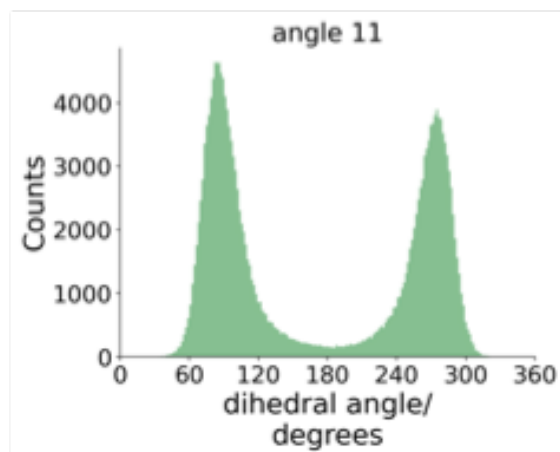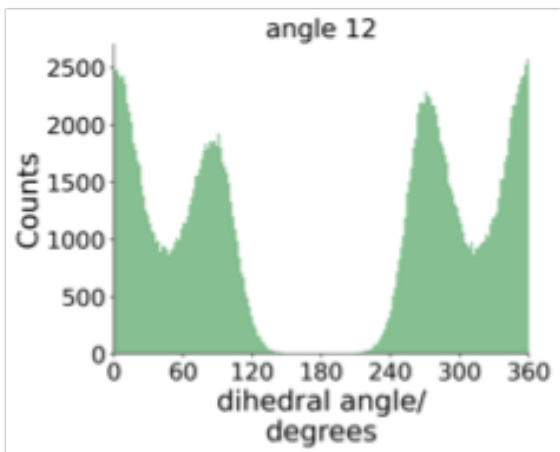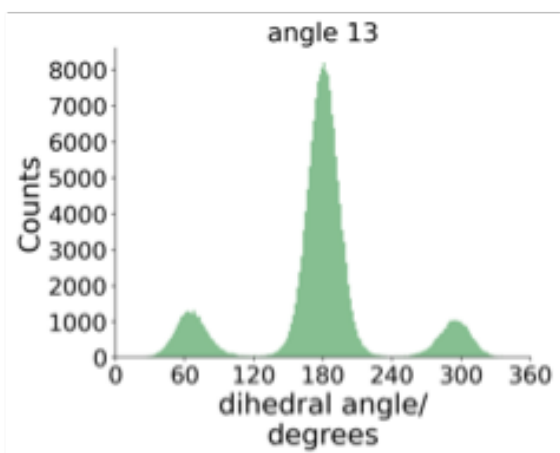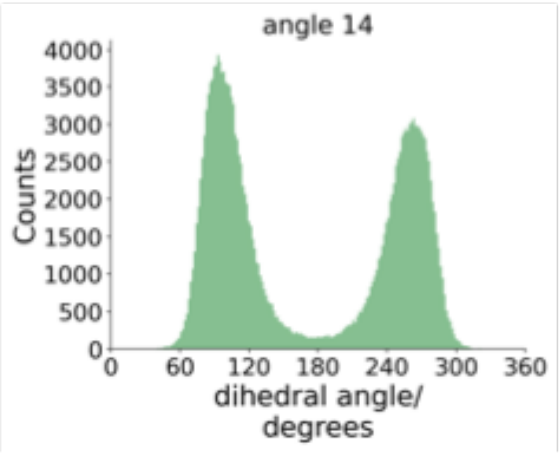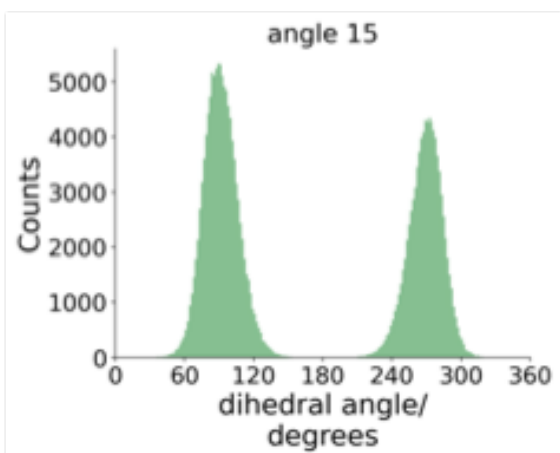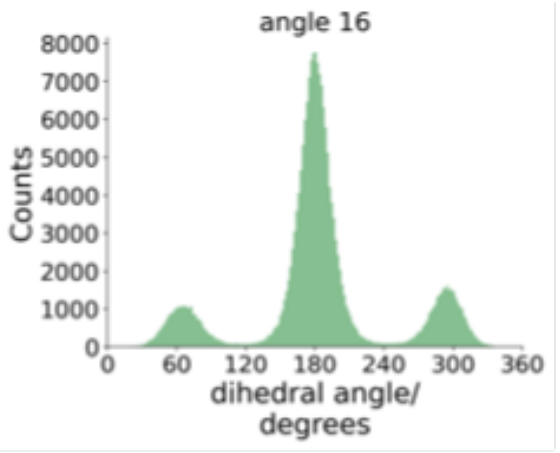

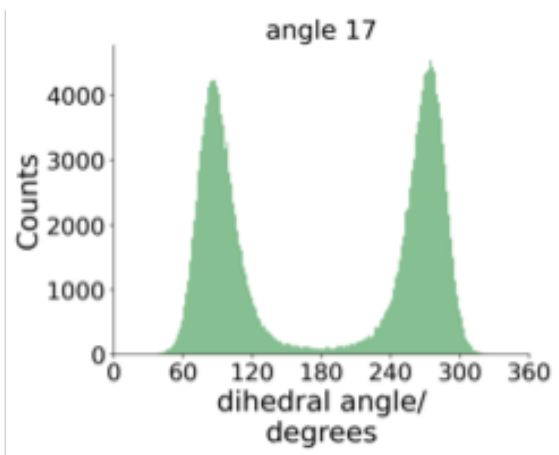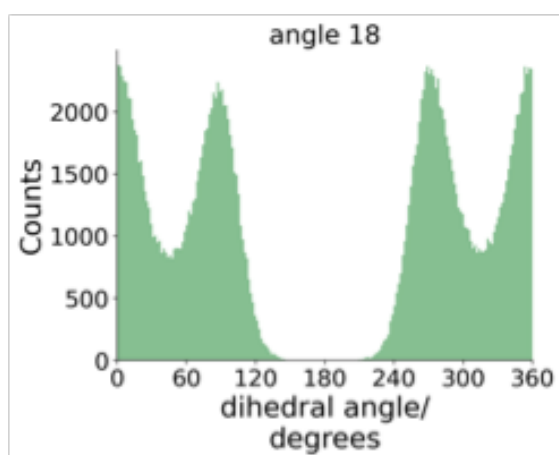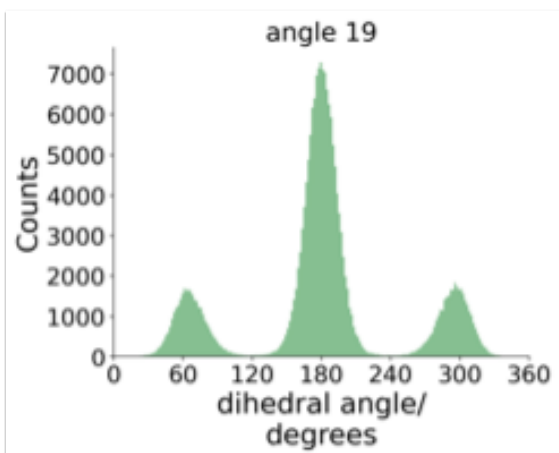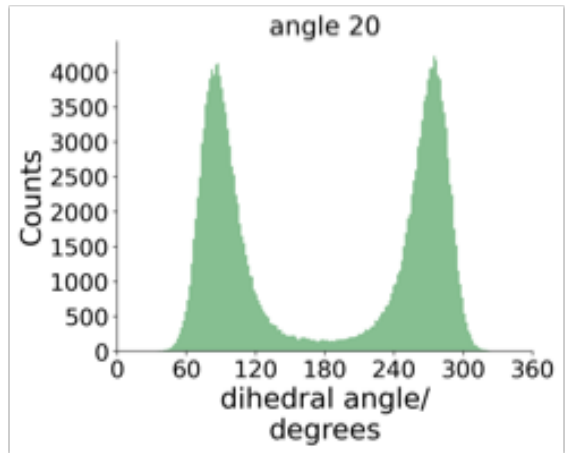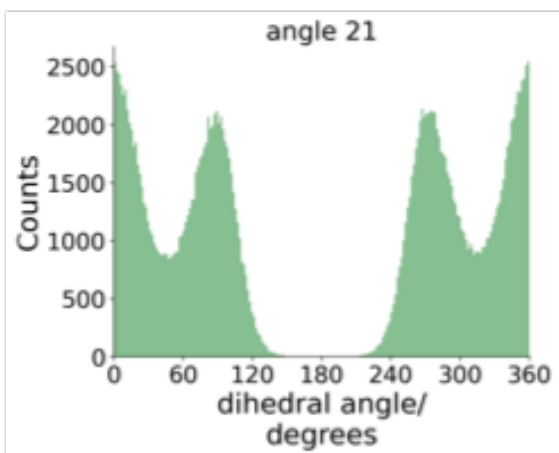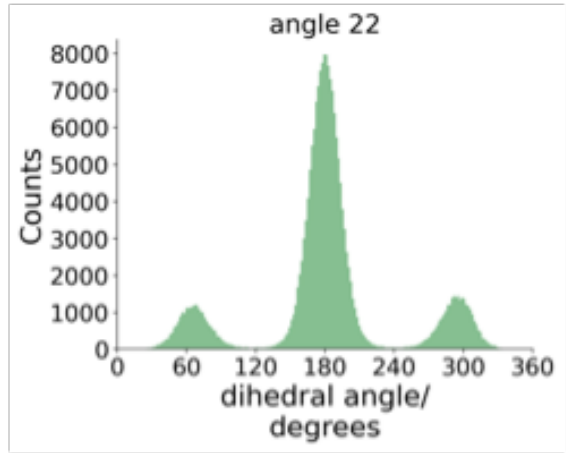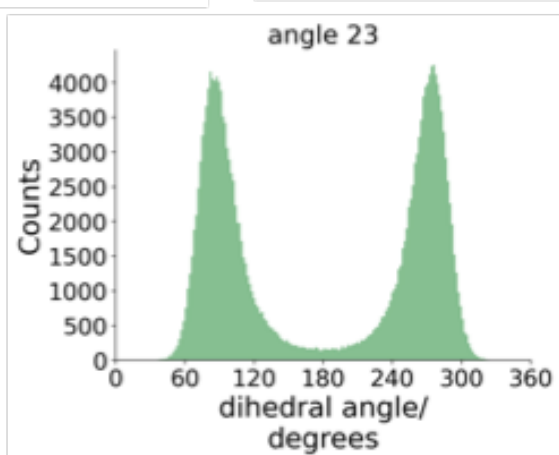

## Figure set S8. Menaquinone-4 (MK4) in a lipid bilayer

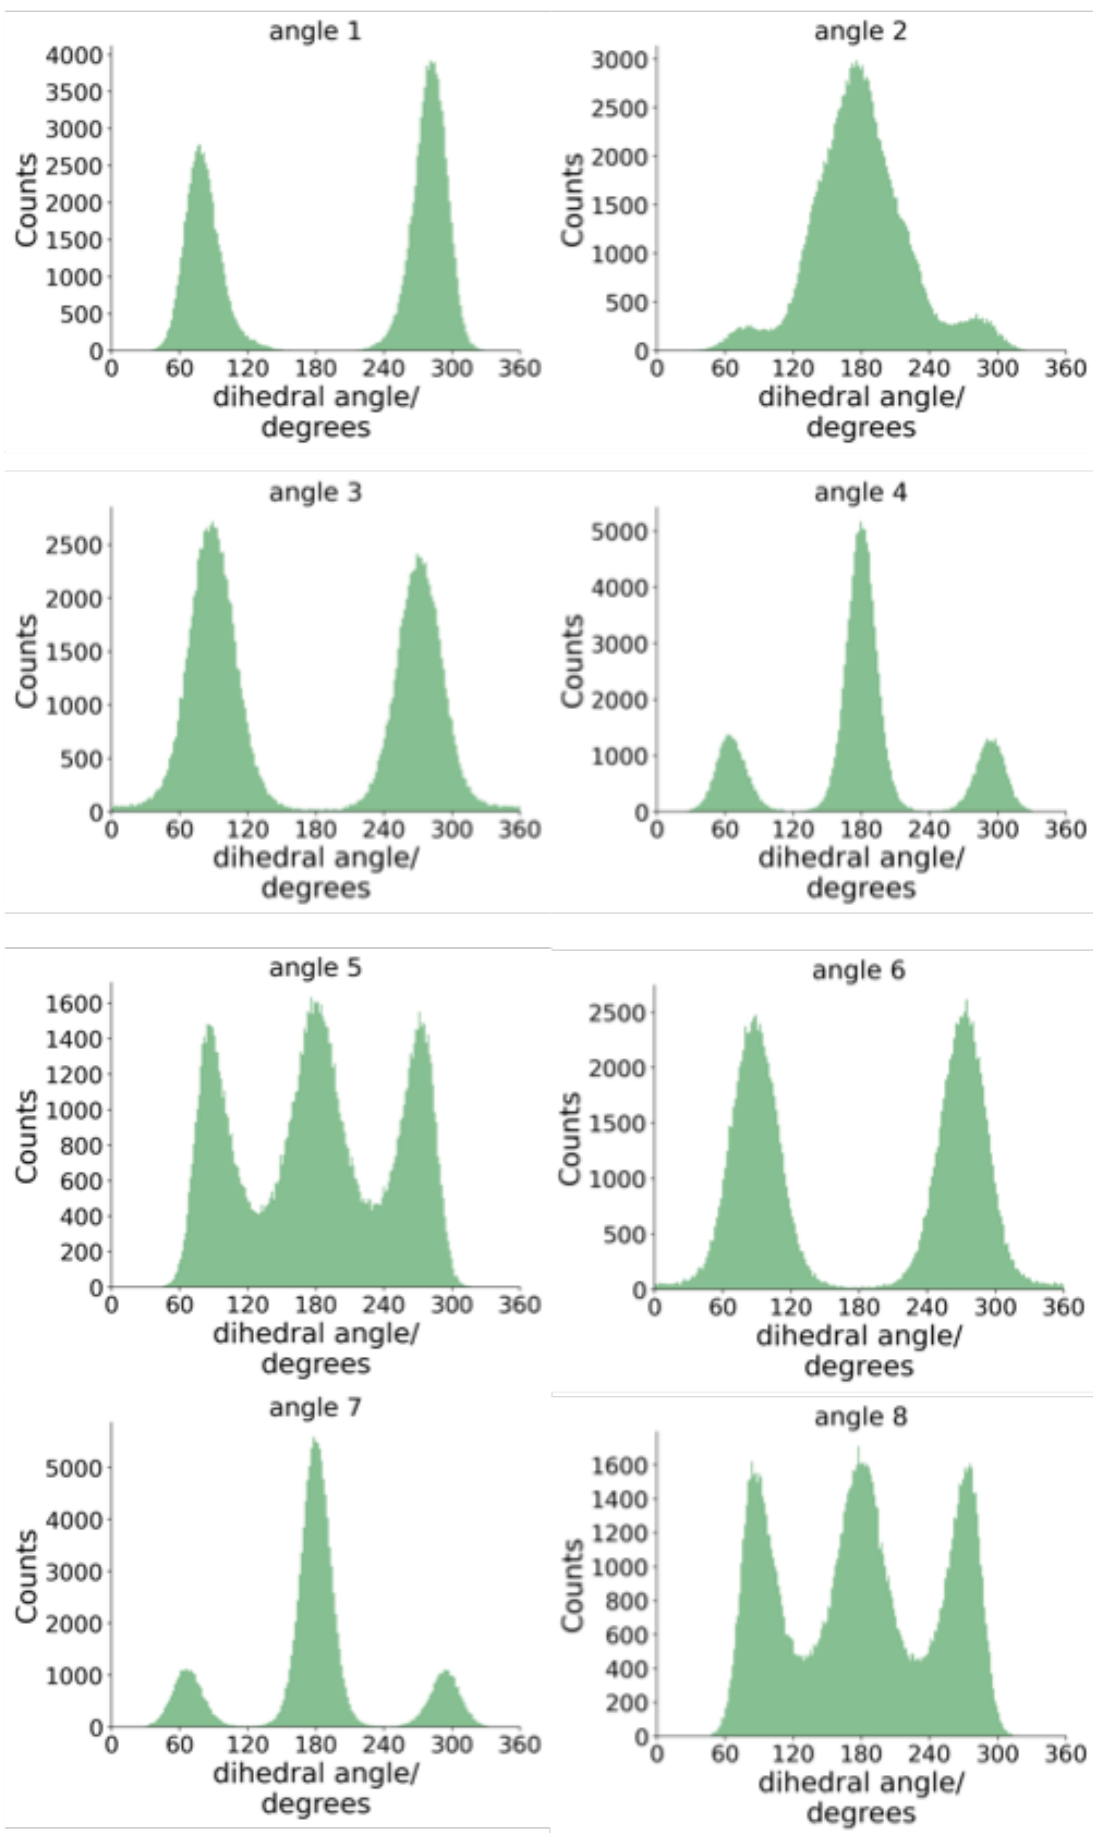

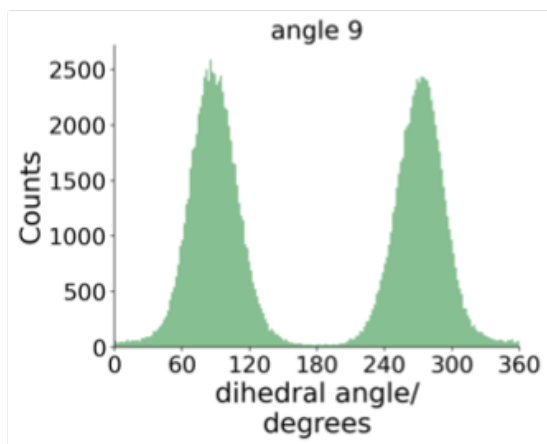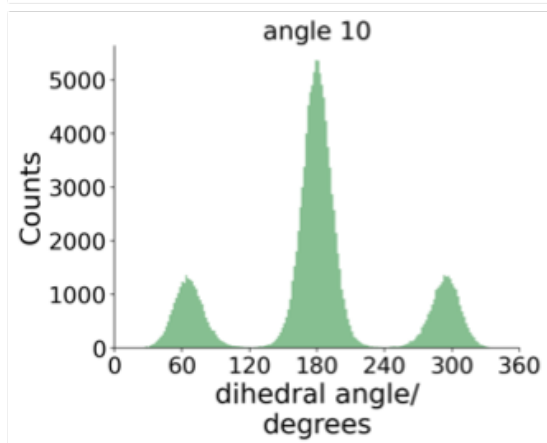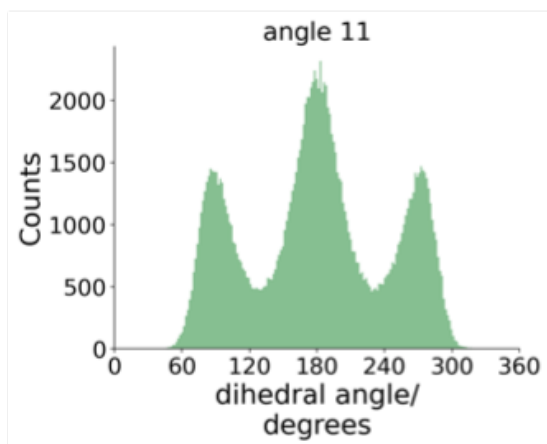

**Figure set S9.** Menaquinone-6  
(MQ6) in n-hexane



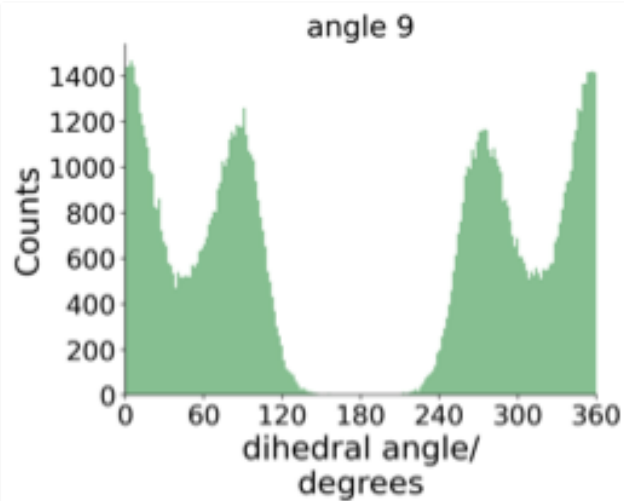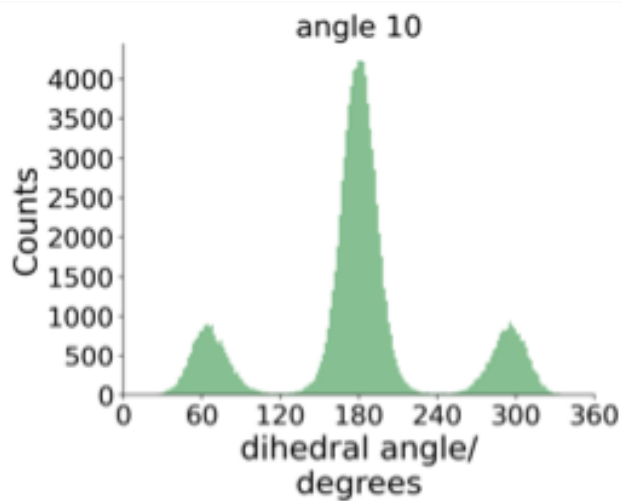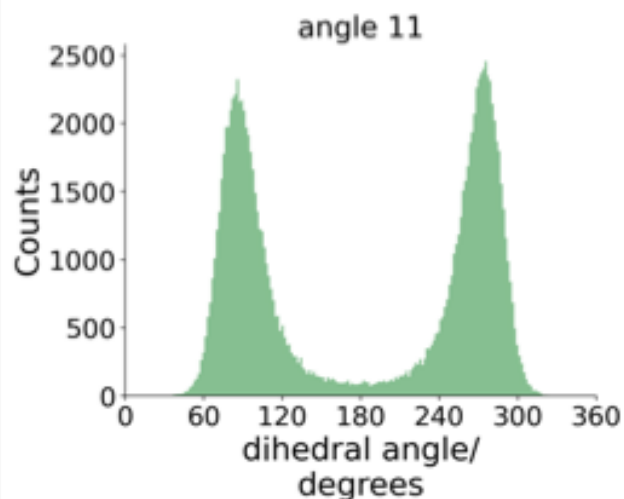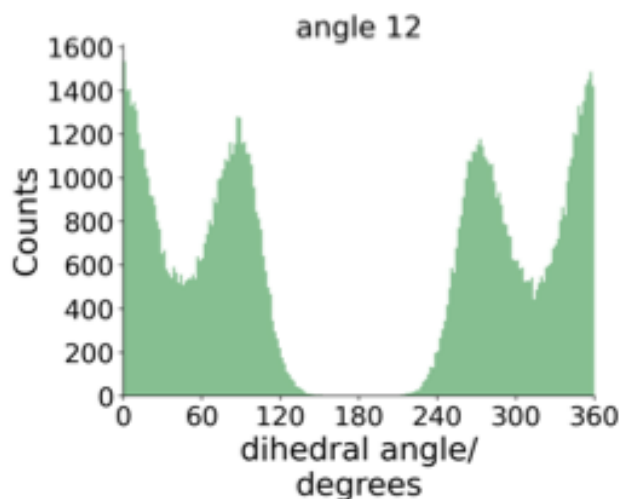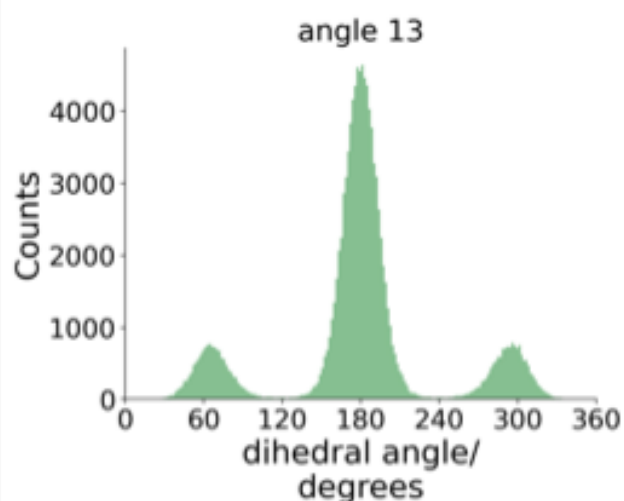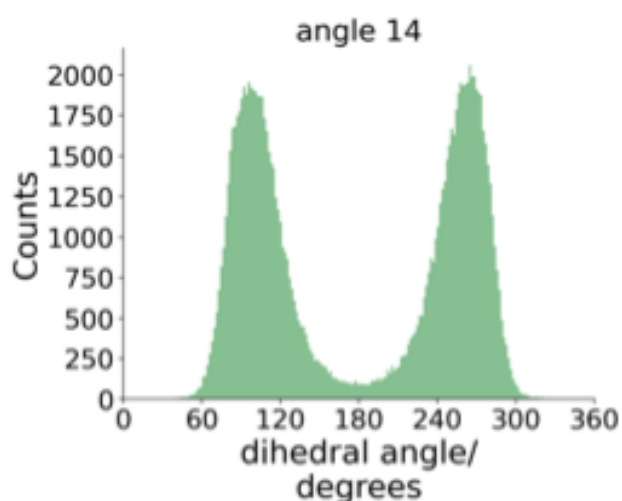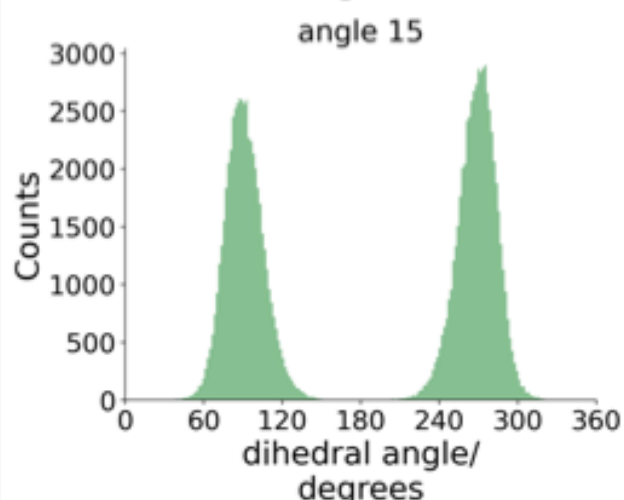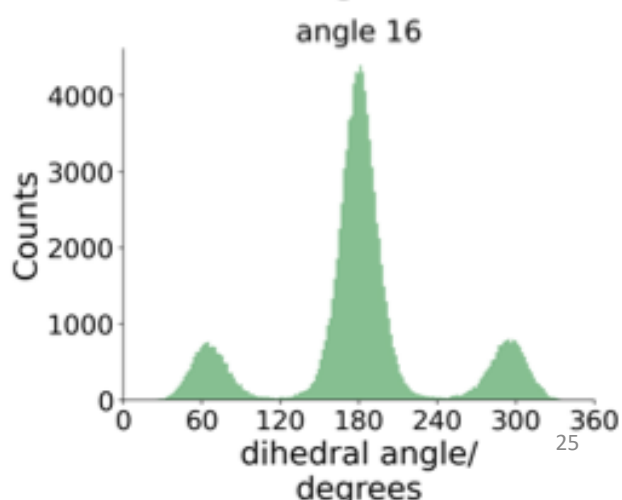

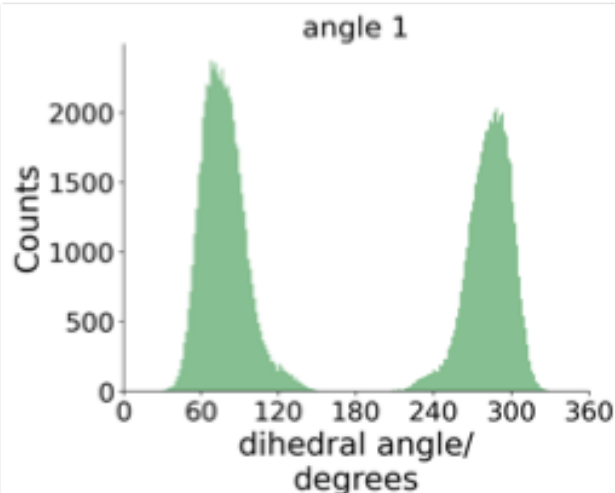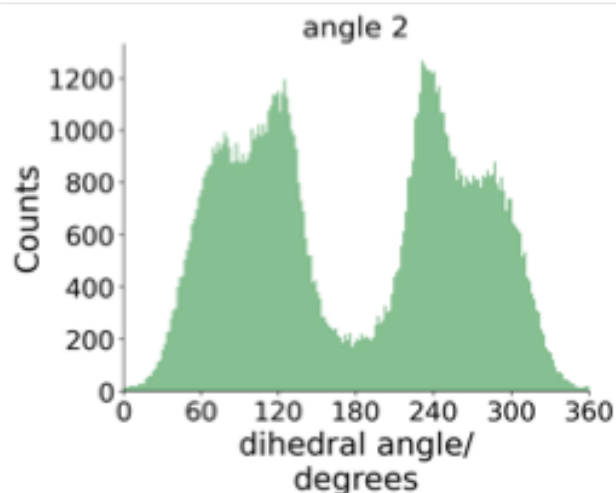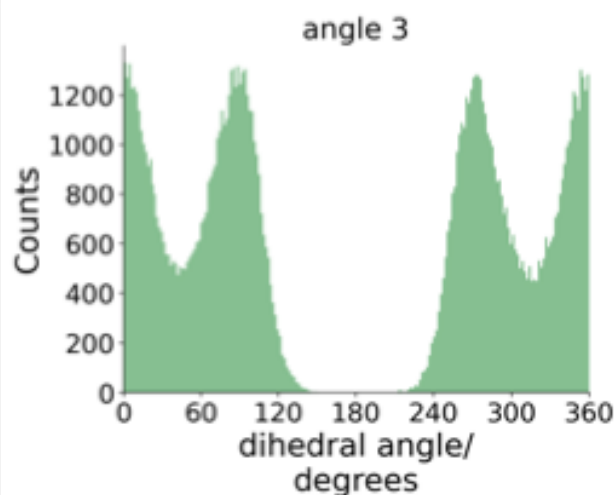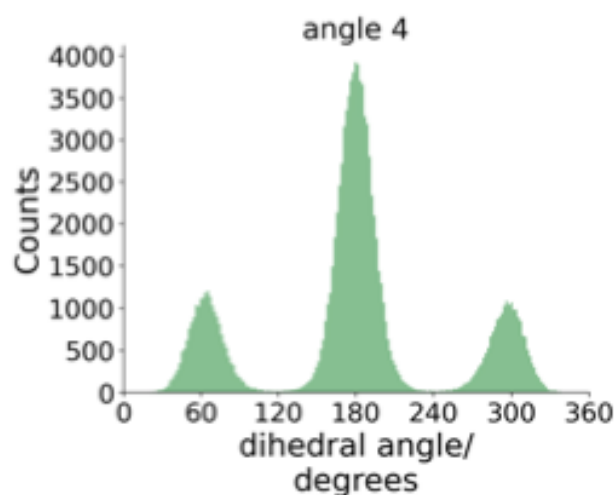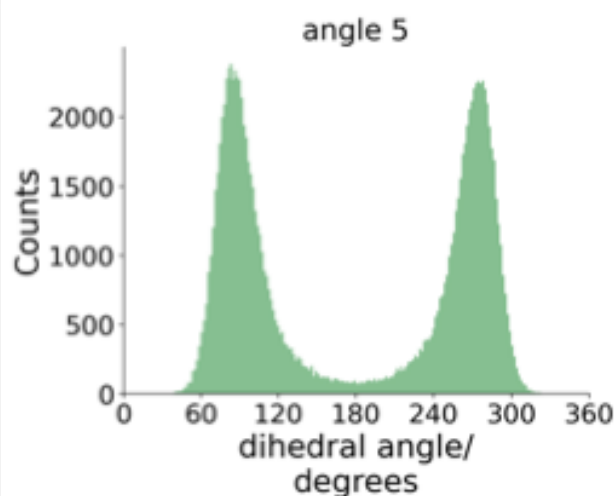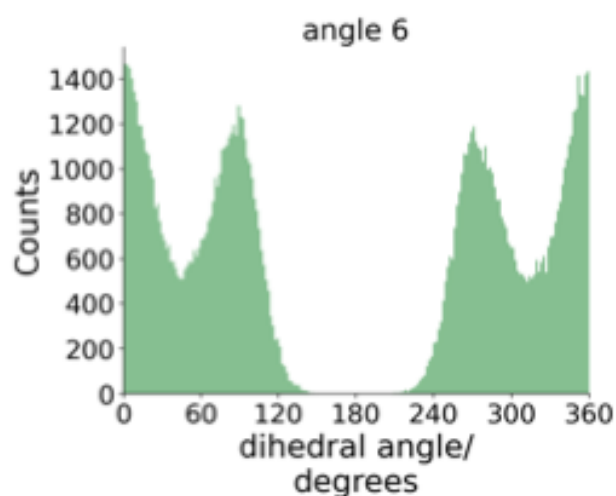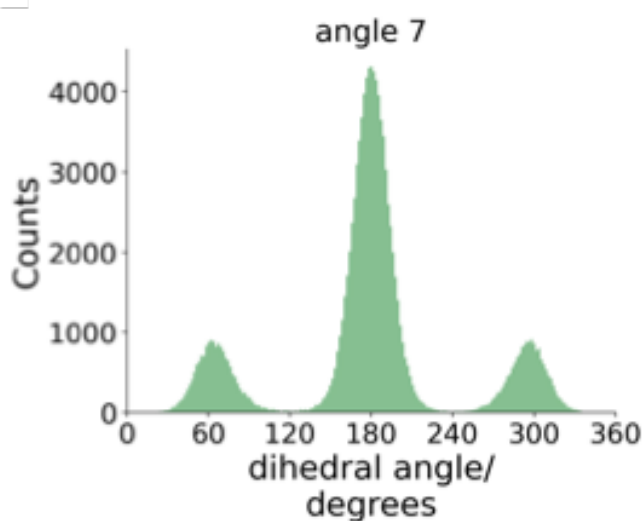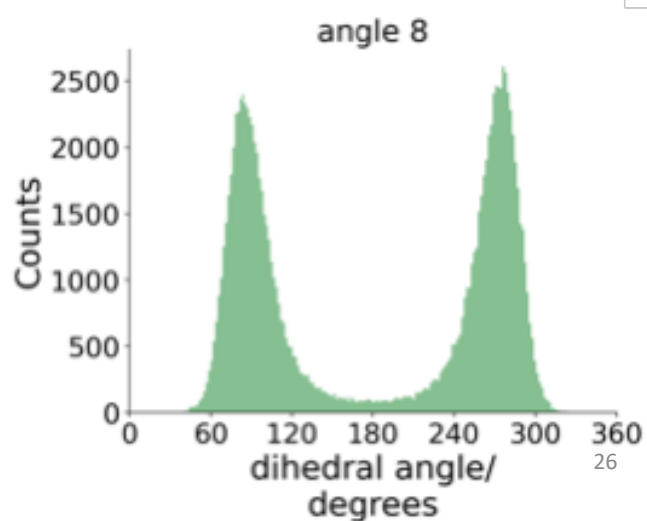

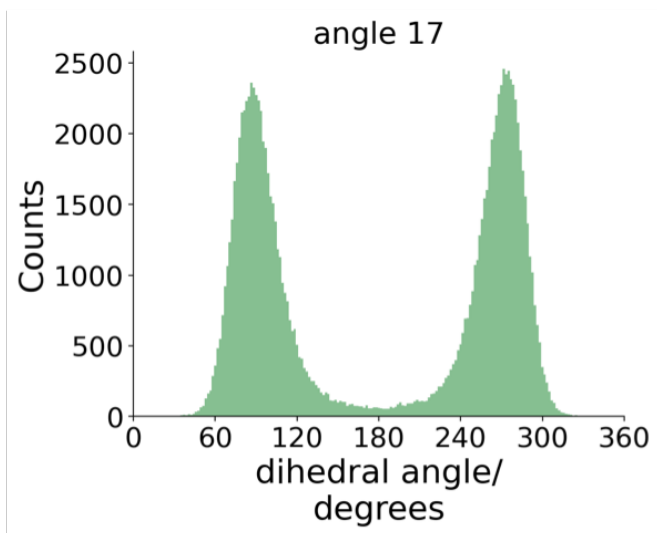

**Figure set S10.** Menaquinone-6  
(MQ6) in a lipid bilayer

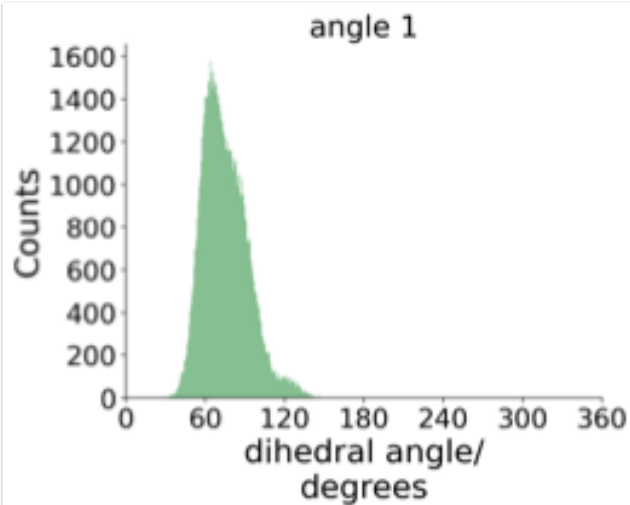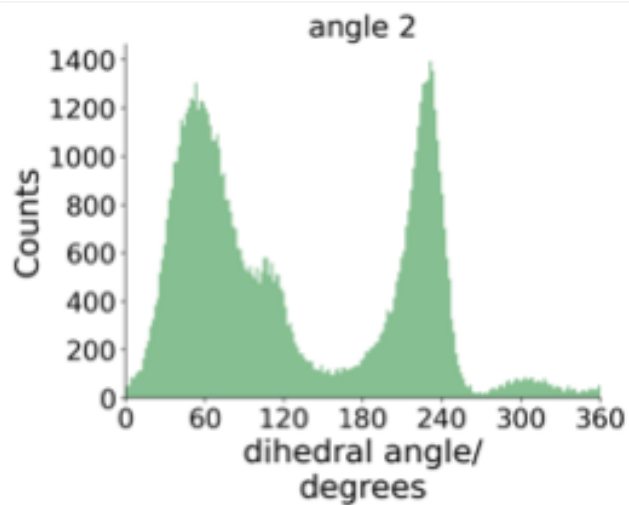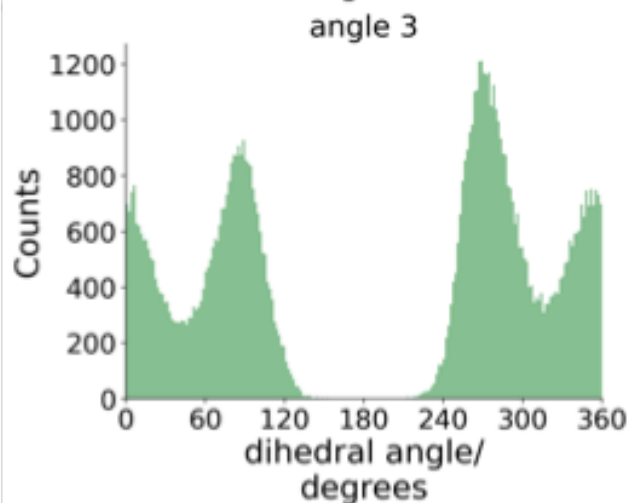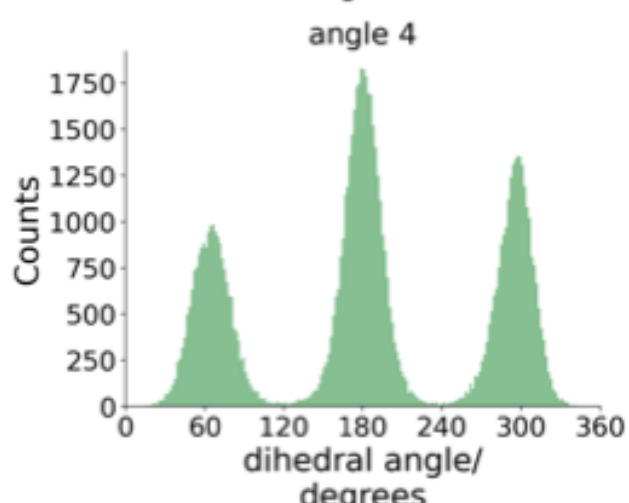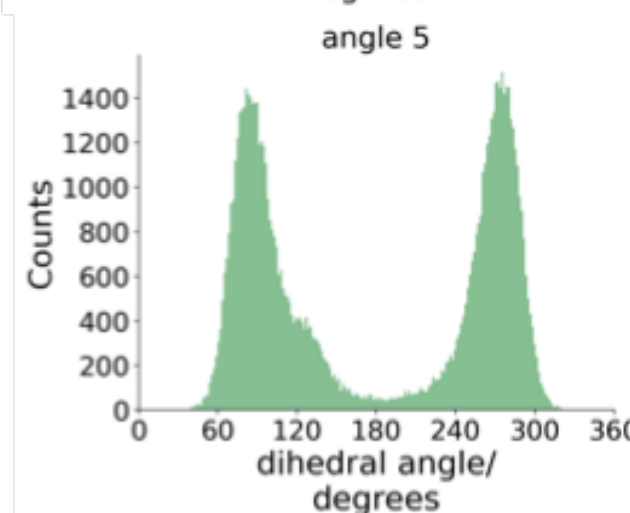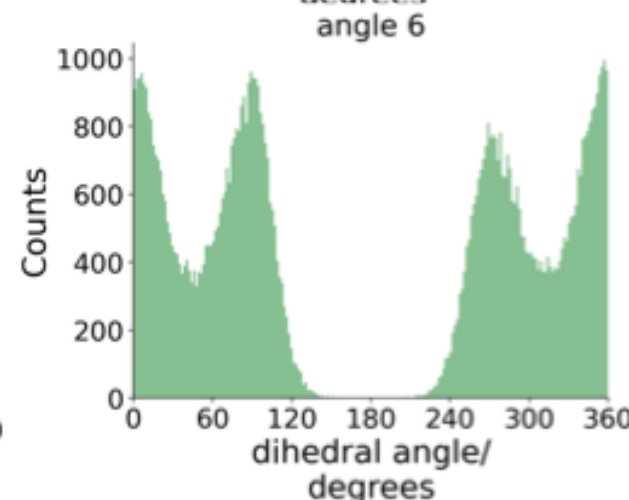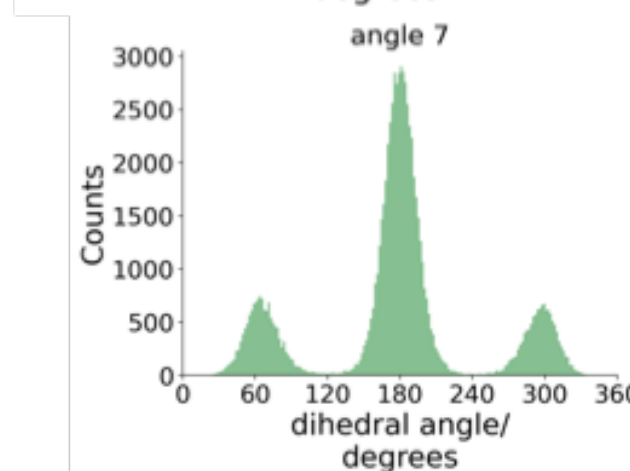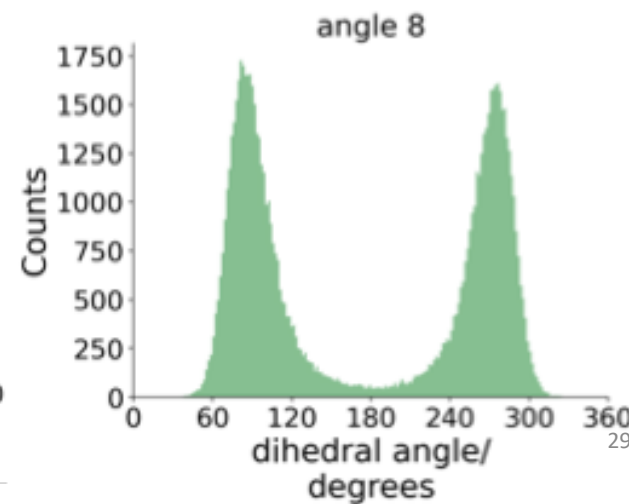

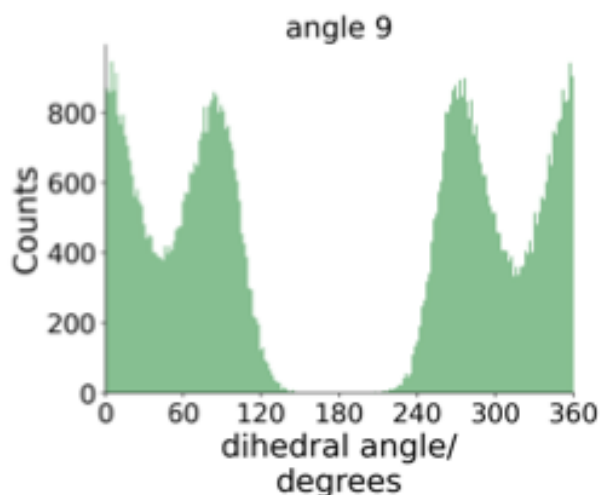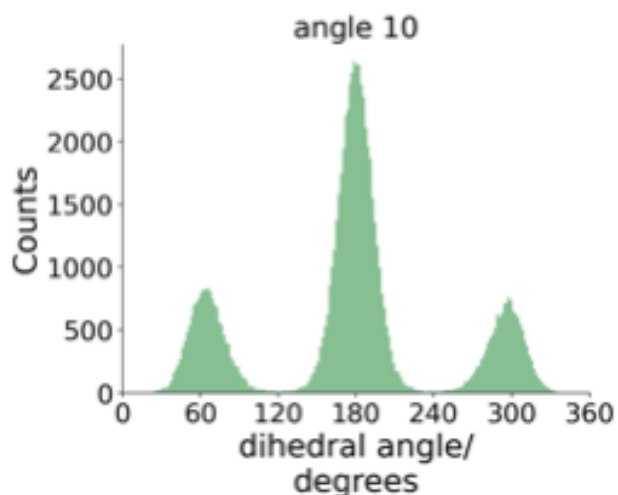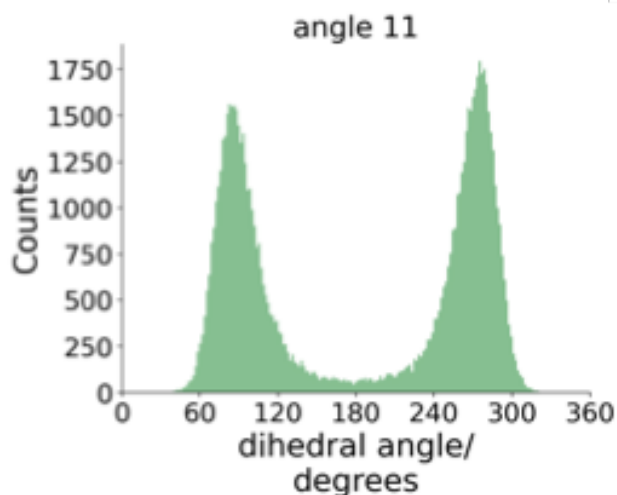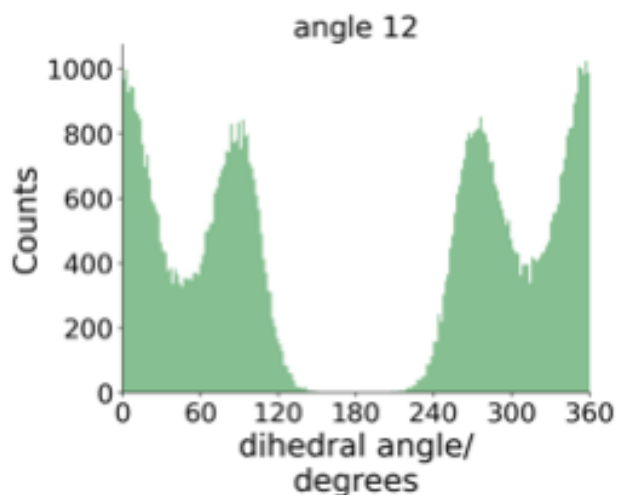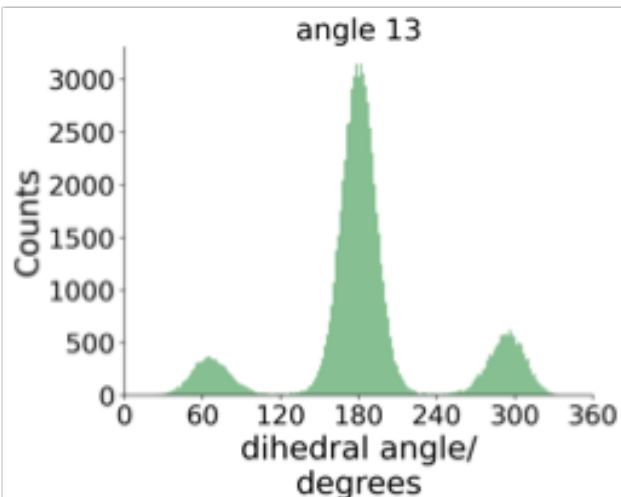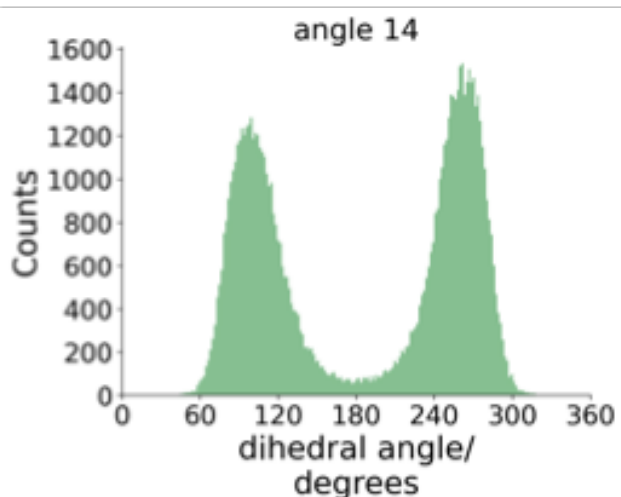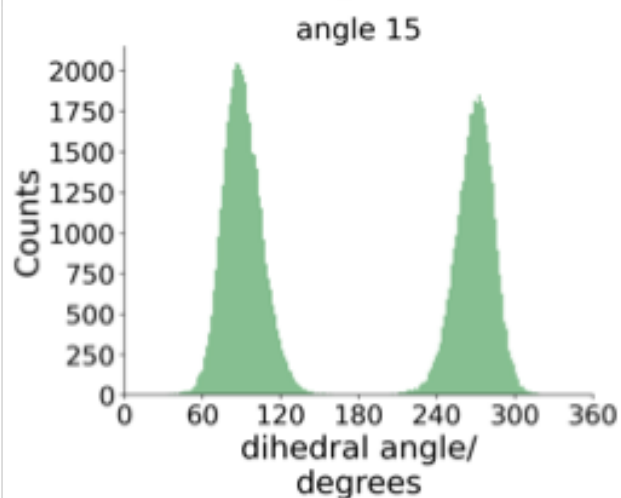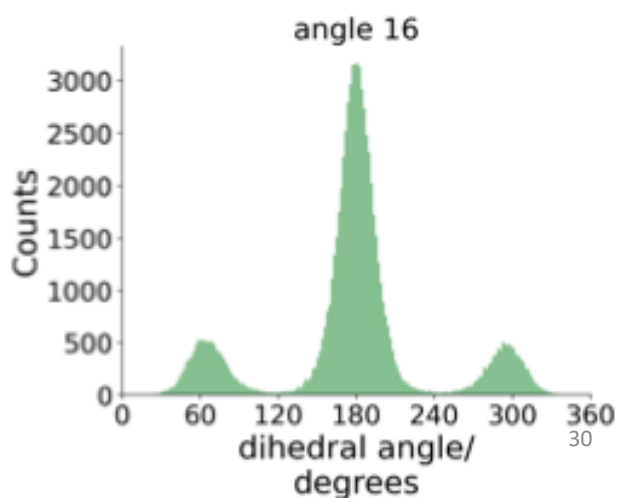

**Figure set S11.** Menaquinone-8  
(MQ8) in a lipid bilayer

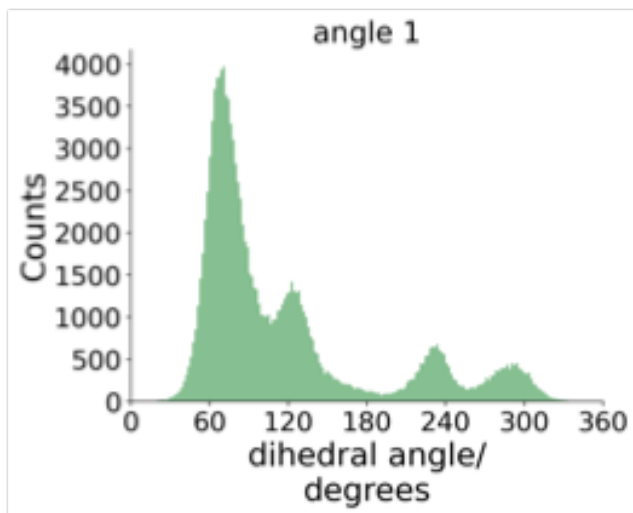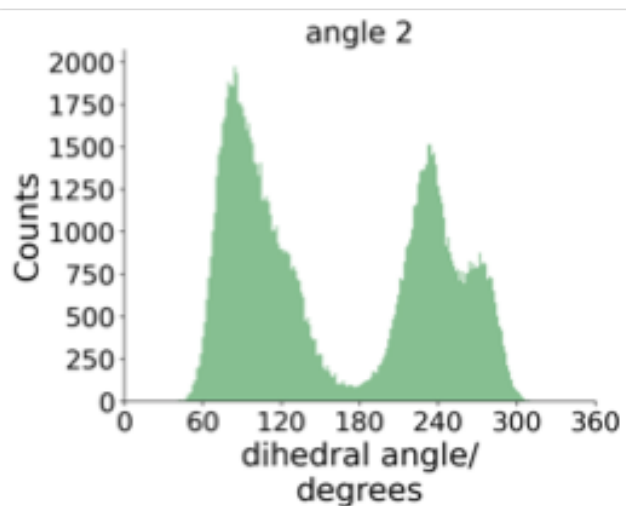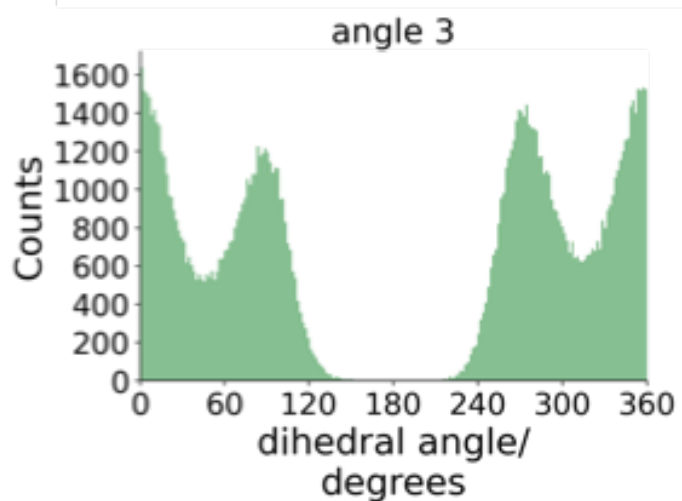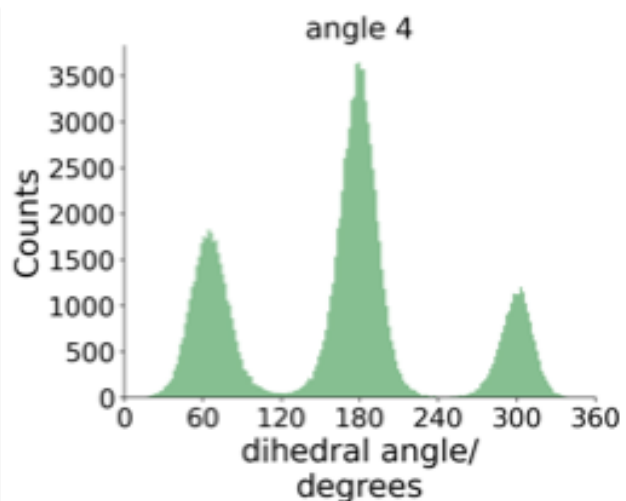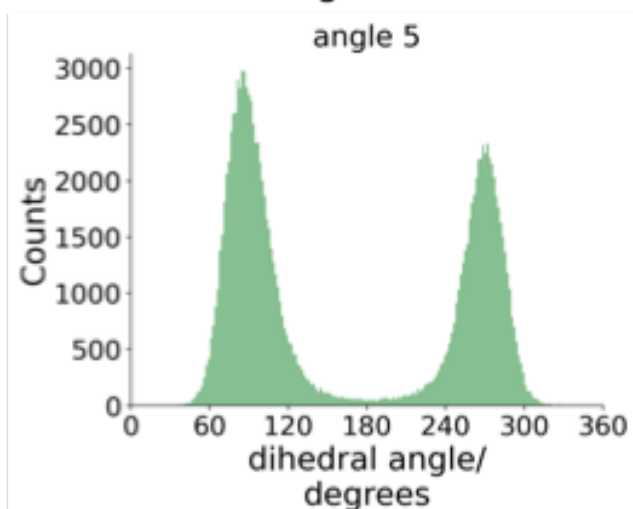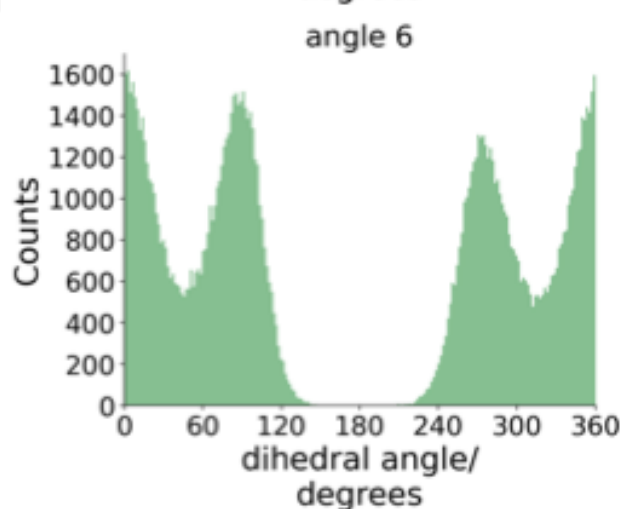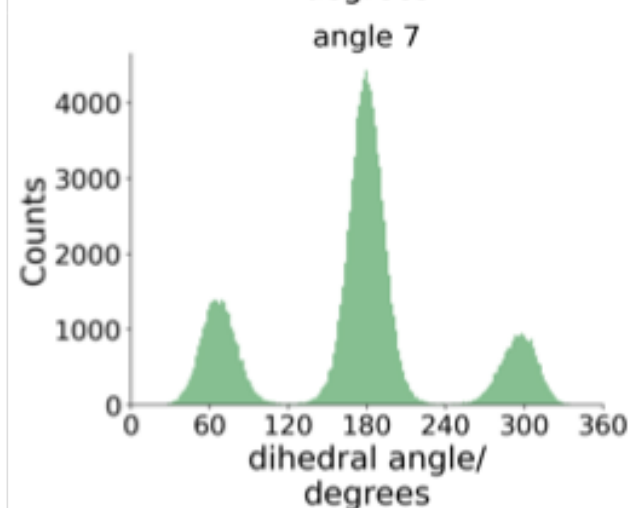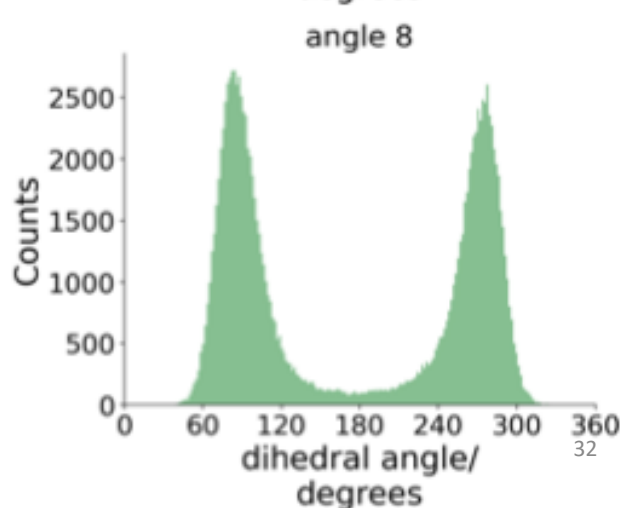



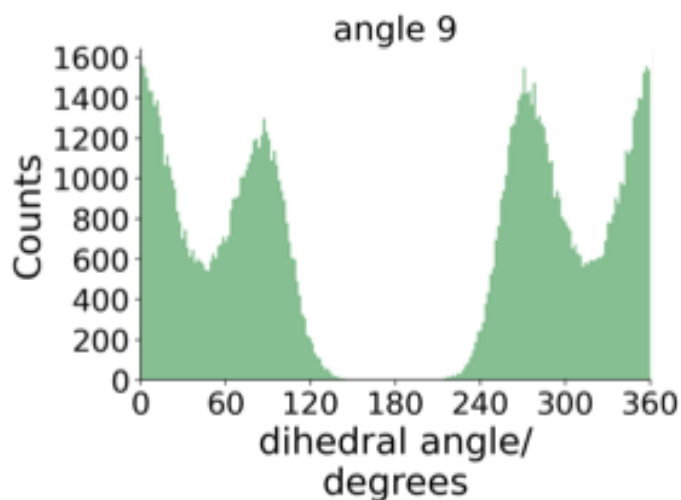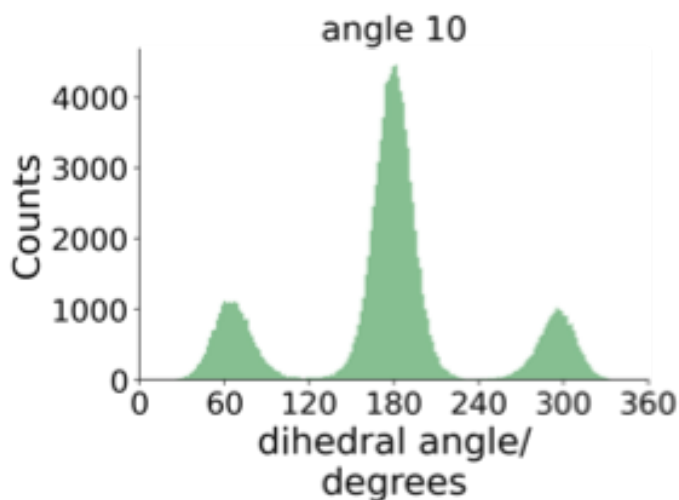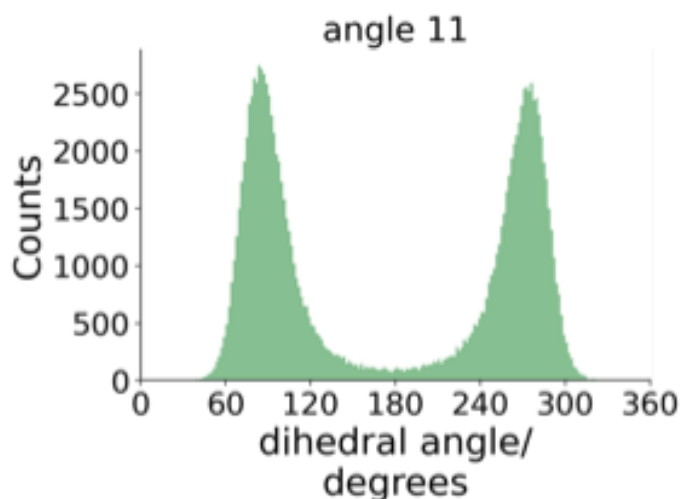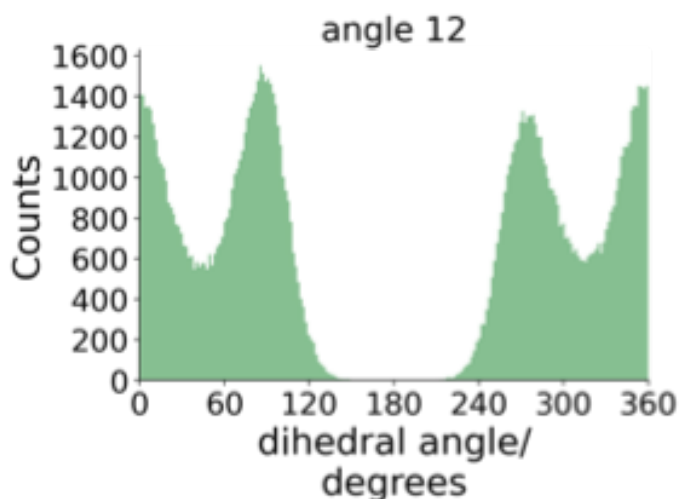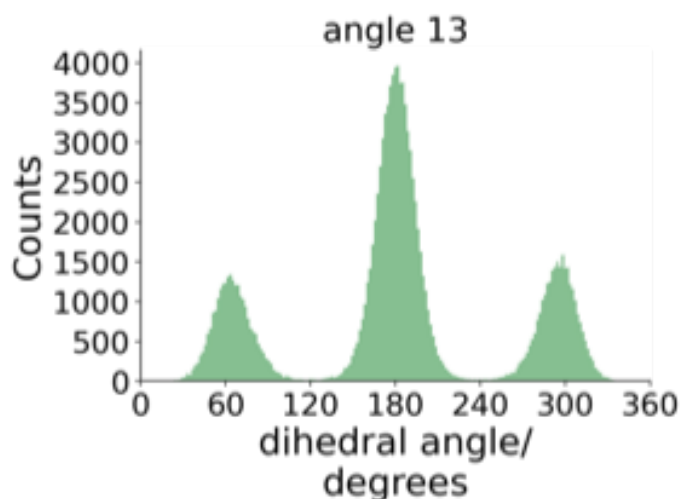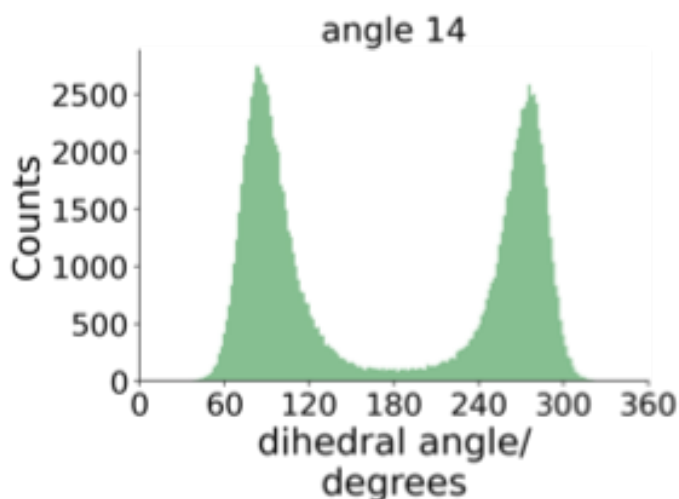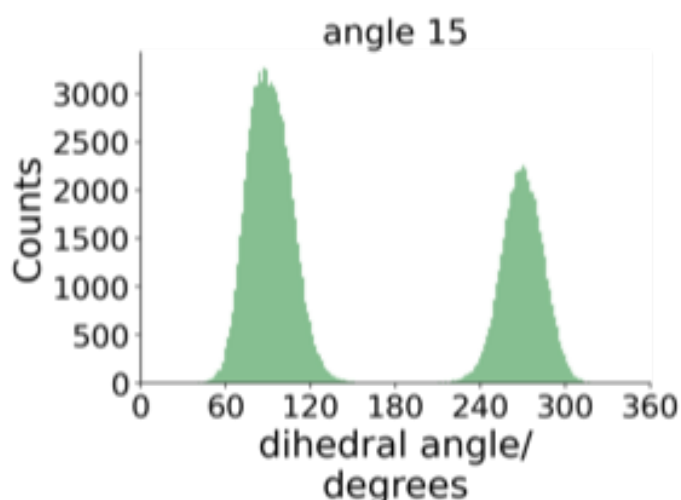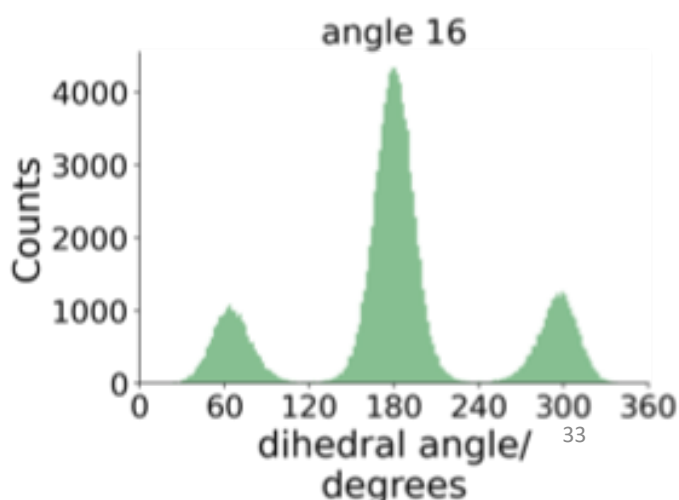

angle 17

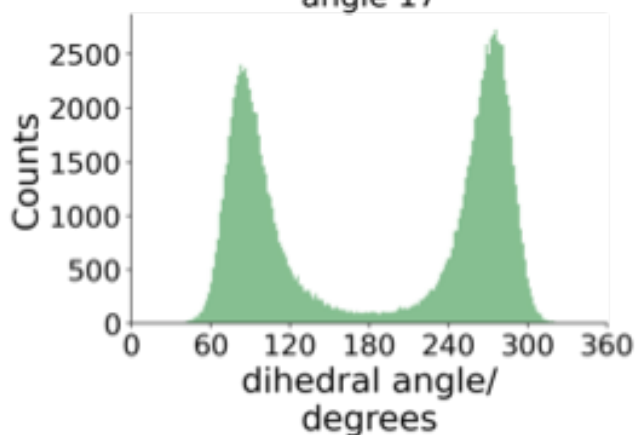

angle 18

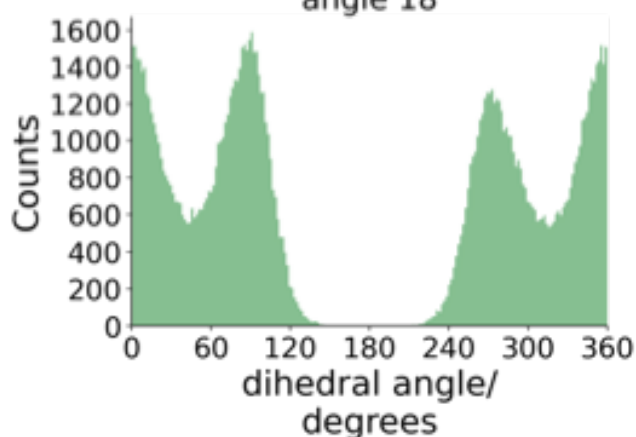

angle 19

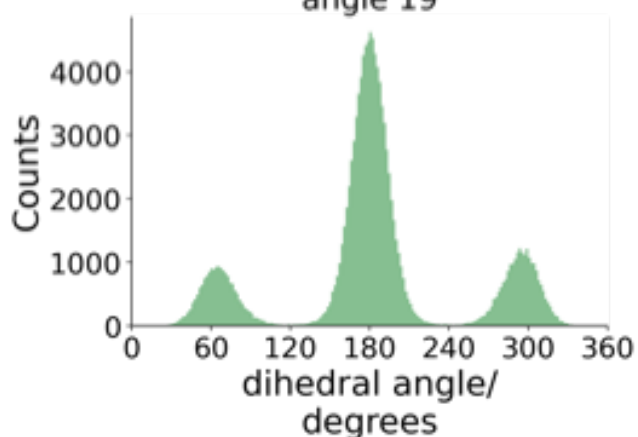

angle 20

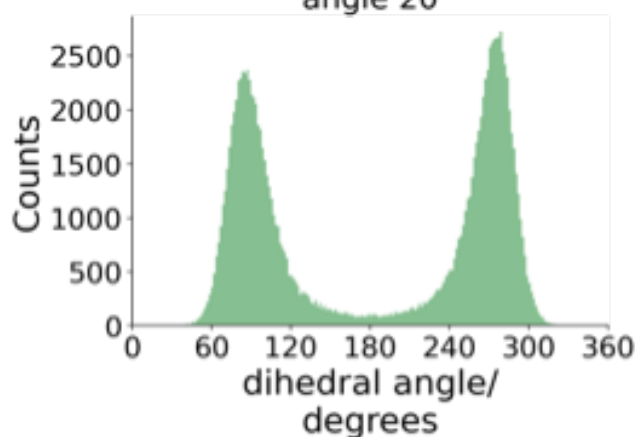

angle 21

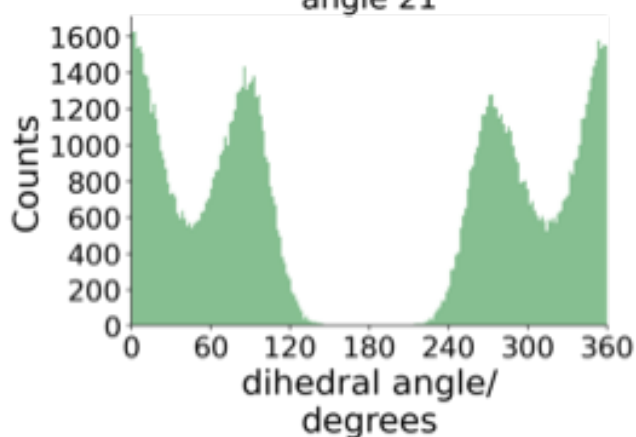

angle 22

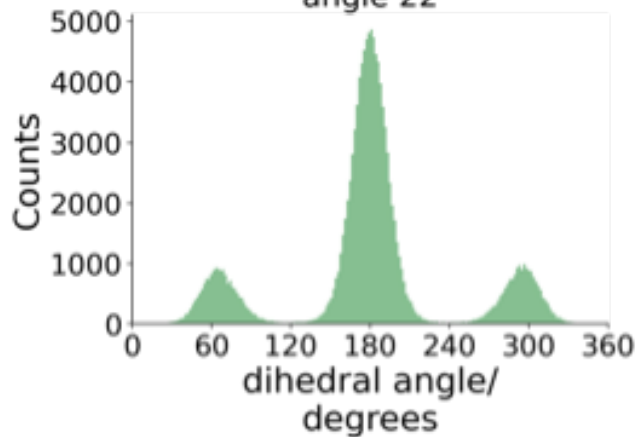

angle 23

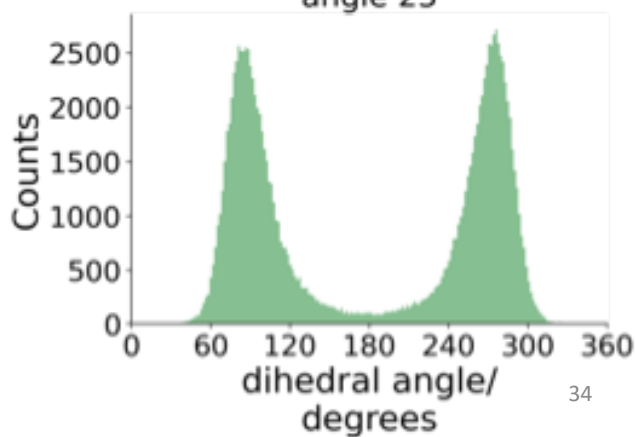

Supplement: d3cp03466f1.pdf [file d3cp03466f1.pdf]
